# Excitable RhoA dynamics drive pulsed contractions in the early *C. elegans* embryo.

**François B. Robin<sup>1,6\*</sup>, Jonathan B. Michaux<sup>1\*</sup>, William M. McFadden<sup>3</sup>, Edwin M. Munro<sup>1,2,3,4,5</sup>**

*1 Department of Molecular Genetics and Cell Biology, University of Chicago, Chicago IL, 60637*

*2 Committee on Development, Regeneration and Stem Cell Biology, University of Chicago, Chicago IL, 60637*

*3 Biophysics Program, University of Chicago, Chicago IL, 60637*

*4 Institute for Biophysical Dynamics, University of Chicago, Chicago IL, 60637*

*\* Equal contributions*

*5 Correspondence to: [emunro@uchicago.edu](mailto:emunro@uchicago.edu)*

*6 Current address: Sorbonne Universités, UPMC Univ Paris 06, CNRS, INSERM, Biologie du Développement Paris Seine - Institut de Biologie Paris Seine (LBD - IBPS), 75005 Paris, France*

## Abstract

Pulsed actomyosin contractility underlies diverse modes of tissue morphogenesis, but the mechanisms that generate pulsed contractions are still poorly understood. Here, we combine quantitative imaging with genetic perturbations and mathematical modeling to identify a core mechanism for pulsed contractility in early *C. elegans* embryos. We show that pulsed accumulation of actomyosin is governed almost entirely by local control of assembly and disassembly downstream of RhoA. Pulsed activation and inactivation of RhoA precedes, respectively, the accumulation and disappearance of actomyosin, and persists in the near complete absence of Myosin II. Autocatalytic activation of RhoA underlies rapid pulse initiation, while delayed accumulation of the RhoA GTPase activating proteins (GAPs) RGA-3/4 provides negative feedback to terminate each pulse. Mathematical models, tightly constrained by our experiments, confirm that this combination of positive and negative feedback is sufficient to generate locally pulsatile RhoA dynamics and reproduce the observed waveform of RhoA activation and RGA-3/4 accumulation. We propose that excitable RhoA dynamics are a common driver for pulsed contractility that can be tuned or coupled to actomyosin dynamics in different ways to produce a diversity of morphogenetic outcomes.

# Introduction

Pulsed contractility is a widespread mode of actomyosin contractility expressed by many non-muscle cells in which transient accumulations of F-actin and Myosin II accompany local contractions of the cell surface. Pulsed contractions were first identified in the polarizing *C. elegans* zygote (Munro et al., 2004), and have now been documented in a wide variety of embryonic and extra-embryonic epithelia (He et al., 2010; Blanchard et al., 2010; Rauzi et al., 2010; David et al., 2010; Martin et al., 2009; Solon et al., 2009) and mesenchymal cells (Kim and Davidson, 2011). A similar phenomenon known as cell shape oscillations have been observed in many cultured cells (Sedzinski et al., 2011; Salbreux et al., 2007; Kapustina et al., 2008). Pulsed contractions produce transient shape changes that can be biased or rectified in different ways to produce distinct morphogenetic outcomes such as tissue invagination (Martin et al., 2009), tissue elongation (Rauzi et al., 2010; Levayer and Lecuit, 2013; He et al., 2010), epithelial tissue closure (Solon et al., 2009) and wound healing (Razzell et al., 2014). During embryonic development, pulsed contractions may represent an adaptation to accommodate rapid cell and tissue deformations while maintaining overall tissue integrity (Vasquez et al., 2014). In other contexts, such as in many cultured cells, shape oscillations may represent an aberrant behavior that manifests when cells lose normal adhesion to their substrates (Salbreux et al., 2007; Paluch et al., 2005), or when microtubules are depolymerized (Kapustina et al., 2013; 2008; Rankin and Wordeman, 2010; Werner et al., 2007; Piekny and Glotzer, 2008; Bornens et al., 1989) or when contractile tension is very high during cytokinesis (Sedzinski et al., 2011).

Despite their widespread occurrence and increasing evidence for their functional relevance, the mechanisms that initiate and terminate pulsed contractions remain poorly understood. From a dynamical perspective, pulsed contractions represent a form of excitable behavior, exemplified by action potentials in neuronal cells (Izhikevich, 2007) or pulses of intracellular calcium release observed in many cell types (Goldbeter, 1996). Theoretical studies highlight two key ingredients for excitability: positive feedback to drive rapid upswing in activity, and delayed negative feedback to bring it back down again. A key challenge is to identify the specific modes of positive and negative feedback that drive pulsed contractions.

Multiple forms of positive feedback could contribute to initiating pulsed contractions. For example, local actomyosin-based contraction could promote further accumulation of actomyosin through mechanosensitive motor-filament binding (He et al., 2010; Fernandez-Gonzalez et al., 2009; Ren et al., 2009; Effler et al., 2006; Schiffhauer et al., 2016), by enhancing actin filament assembly and/or stability (Hayakawa et al., 2011; De La Cruz and Gardel, 2015), or by transporting and concentrating actomyosin and/or its upstream activators (Munjal et al., 2015; Dierkes et al., 2014). Alternatively, dynamic clustering of F-actin and/or Myosin II by scaffolding proteins such as Anillin could promote Myosin II recruitment and focal contraction (Maddox, 2005). Finally, autocatalytic activation of upstream regulators such as RhoA could drive local excitation, independent of, or in addition to, myosin-based tension or network contraction (Zhang and Glotzer, 2015; Munjal et al., 2015; Bement et al., 2015). Similarly, multiple forms of delayed negative feedback could contribute to terminating pulses, including progressive buildup of steric or elastic resistance to further contraction (Dierkes et al., 2014), or

contraction-mediated disassembly, or delayed recruitment of disassembly factors or inhibitors of Myosin II or RhoA (Munjal et al., 2015; Kasza and Zallen, 2011; Bement et al., 2015).

Here we combine quantitative imaging with experimental manipulations and mathematical modeling to identify the dynamical basis for pulsed contractility in the early *C. elegans* embryo. Using single-molecule imaging and particle tracking analysis, we provide definite evidence that the initiation of pulsed contractions does not involve or require local redistribution of actomyosin or its upstream activators. Instead, pulsed contractions are driven by local pulses of RhoA activity, which feed forward to control local accumulation of downstream targets F-actin, Myosin II and Anillin. We present evidence that pulsed accumulation of RhoA is governed by locally excitable RhoA dynamics: local autocatalytic activation of RhoA drives the rapid upswing of RhoA activity during pulse initiation, while F-actin-dependent recruitment of the redundantly acting RhoA GTPase activating proteins (GAPs) RGA-3/4 provide delayed negative feedback to terminate the pulse. A minimal model, sharply constrained by our experimental data, suggests that this combination of feedbacks is sufficient to generate locally excitable or oscillatory RhoA dynamics and to explain quantitatively the temporal dynamics of RhoA activation and RGA-3/4 accumulation during each pulse. We propose that excitable RhoA dynamics define a core mechanism for pulsed contractility and suggest that this mechanism may be tuned or filtered through downstream effectors to control the size or spacing or lifetime of pulsed contractions.

## Results

Pulsed contractions were originally described in *C. elegans* during interphase in the polarizing zygote P0 (Movie S1, top; Figure 1 A-C, individual pulses indicated by white arrowheads in Figure 1B; (Munro et al., 2004)). In these cells, pulsed contractions are associated with transient deep invaginations of the cell surface (magenta arrows in Figure 1A,B); this makes it more difficult to quantify local changes in density of cortical factors during individual pulses, because these measurements could be confounded by movements of the cortex in/out of the plane of focus. Therefore, we focused on pulsed contractions that occur at the two-cell stage in the anterior blastomere known as AB (Figure 1D-F, individual pulses indicated by white arrowheads in Figure 1E;). As in P0, pulsed contractions in AB involve transient accumulations of F-actin and Myosin II; they are associated with transient local contractions of the actomyosin cortex (Figure 1F), but they are not associated with pronounced invaginations of the cell surface.

### **Single-molecule analysis of actomyosin dynamics during pulsed contractions**

As a key step towards distinguishing different mechanisms for pulsed contractions, we used single-molecule imaging and single-particle tracking analysis to quantify the relative contributions of local turnover and redistribution to changes in F-actin and Myosin II density during individual pulses. As described previously (Robin et al., 2014), we used RNAi against GFP to obtain embryos expressing single molecule levels of Actin::GFP or of the non-muscle myosin heavy chain fused to GFP (NMY-2::GFP) over the endogenous proteins (Figure 2A, Movies S2,4). We combined near-total internal reflection fluorescence (TIRF) imaging with single-molecule detection and tracking to measure the appearance, motion and disappearance of

single-molecule speckles (Figure 2A-C, (Robin et al., 2014)). We assumed, with others (Watanabe and Mitchison, 2002; Vallotton et al., 2004), that single molecule appearance and disappearance events report directly on local rates of filament assembly and disassembly. We have shown previously that rates of turnover measured by single-molecule tracking agree well with those measured from single-molecule data by fitting kinetic models to photobleaching curves ((Robin et al., 2014), Materials and Methods).

We then devised new methods to measure simultaneously: (a) single molecule appearance rates, disappearance rates and densities, and (b) local rates of cortical deformation, on a moving and deforming patch of cortex during individual pulsed contractions (Figure S1; see Materials and Methods for details). Briefly, we identified a reference frame for each pulse near the onset of contraction; within that frame, we identified a polygonal region of interest containing the contracting patch (dashed blue polygon in Figure 2A; hereafter “the patch”); we propagated the patch forward and backwards in time by extrapolating the displacements of tracked particles on or near its boundary (Figure 2D, Figure S1, Movie S3). We then measured local deformation of the patch as frame-to frame changes in patch area, or by estimating a local strain rate from frame-to-frame displacements of the individual particles, with similar results in both cases (Figure 2E; Figure S2A-C; Materials and Methods). At the same time, we measured the number of molecules and single-molecule appearance and disappearance rates within the patch over time (Figure 2F-H). Finally, we aligned single-molecule measurements with respect to the onset or termination of individual contractions to produce a dynamical signature of actin assembly, disassembly and deformation over the lifetime of a pulse (Figure 3A-D; Figure S2D-F). These

measurements allowed us to distinguish, cleanly, changes in single-molecule densities due to local assembly and disassembly from those due to local contraction (or expansion) of the cortical patch.

If pulses are initiated by positive feedback in which local contraction concentrates actomyosin and/or its upstream regulators, then the onset of actomyosin accumulation should coincide with the onset of contraction. Contradicting this expectation, we found that, on average, Actin:GFP began to accumulate ~5s before the onset of contraction (Figure 3B,F; Figure S2A-C), during a period of time in which the cortex was locally expanding (Figure 3A). Approximately 30% of the total increase in Actin::GFP single molecule density measured during a pulse occurred before the onset of contraction (Figure S2A-C). This initial accumulation was due entirely to a net imbalance of assembly and disassembly (Figure 3E): Before the onset of contraction, assembly rates increased (Figure 3C) and disassembly rates decreased (Figure 3D), leading to a sharp increase in the net rate of single molecule accumulation that peaked at the onset of contraction (Figure 3E). During the contraction phase itself, the rate of change in single-molecule densities was determined almost entirely by a net imbalance of assembly/disassembly, with a very minor (< 6%) contribution from contraction itself (Figure 3E). Assembly rates decreased steadily, and disassembly rates increased steadily, such that a transition from net assembly to net disassembly (and from increasing density to decreasing density) occurred ~7s sec after the onset of contraction (Figure 3E). We obtained very similar results in embryos depleted of ARX-2, an essential subunit of the ARP2/3 complex (Figure S3), suggesting that our results are not biased



by selective incorporation of Actin::GFP into branched vs unbranched F-actin (Chen et al., 2012).

Single-molecule analysis of GFP-tagged Myosin II (NMY-2::GFP) revealed local assembly/disassembly dynamics that were strikingly similar to those measured for GFP::Actin. (Figure 3G-J). On average, the density of single molecules of NMY-2::GFP began to increase ~6s before the onset of contraction during a period of local cortical expansion (Figure 3H), and approximately 50% of this increase occurred before the onset of contraction. As observed for GFP::Actin, the upswing in Myosin II before the onset of a contraction was associated with both a sharp increase in appearance rates and a sharp decrease in disappearance rates (Figure 3I,J); the net rate of increase peaked at the onset of contraction, and during the contraction phase, the appearance and disappearance rates returned steadily towards baseline levels.

In summary, we find that changes in actomyosin density during pulsed contractions are governed primarily by dynamic local imbalance of F-actin and Myosin II appearance and disappearance rates. A large fraction of the increase in F-actin and Myosin II density during each pulse occurs before the onset of contraction, and local contraction accounts for only a minor fraction of the subsequent density increase during the contraction phase itself. We conclude that changes in actomyosin density during pulsed contractions are governed primarily by dynamic modulation of assembly and disassembly, not by local clustering of these factors or by dynamical coupling of contraction and advection.

## **Pulsed activation of RhoA drives the pulsed accumulation of F-actin and Myosin II.**

The observation that F-actin and Myosin II accumulate with very similar kinetics during pulsed contractions suggests that their accumulation is driven by a common upstream regulator. An obvious candidate is the small GTPase RhoA (encoded by *rho-1* in *C. elegans*), which recruits and/or activates downstream effectors including formins, Rho Kinase (ROCK) and Anillin to control F-actin assembly and Myosin II activation in a variety of cell types (Jaffe and Hall, 2005; Piekny and Glotzer, 2008). RhoA activity is required for pulsed contractions in P0 (Motegi: 2006hi; Schonegg:2007if; Tse et al., 2012), and a biosensor for active RhoA derived from the RhoA binding domain of Anillin (henceforth GFP::AHPH) localizes to contractile foci in the zygote(Tse et al., 2011).

To determine if pulsed activation of RhoA accompanies pulsed contractions, we used a strain co-expressing GFP::AHPH (Tse et al., 2012) with an RFP-tagged version of the myosin heavy chain (NMY-2::RFP) to co-monitor RhoA activity and Myosin II accumulation during individual pulses in AB. We observed a striking correlation between pulsed accumulation of GFP::AHPH and NMY-2::RFP during individual pulsed contractions (Figure 4A-C, Movie S5). GFP::AHPH accumulated rapidly within a broad domain that prefigured the initial accumulation of NMY-2::RFP, reached a peak near the onset of visible contraction, and then began to disappear before NMY-2::RFP (Figure 4B,C). The initial accumulation of GFP::AHPH was diffuse, whereas NMY-2::RFP accumulated as discrete particles that increased in number and size before contracting together into a smaller and tighter central domain. During the falling phase of each pulse, the diffuse pool of GFP::AHPH at the outer edges of the initial domain disappeared

rapidly, while a smaller and more persistent fraction of GFP::AHPH co-localized with NMY-2::RFP particles in the central domain (yellow arrows in Figure 4B; Figure S4).

To quantify these observations, we aligned data for multiple pulses from embryos co-expressing NMY-2::RFP and GFP::AHPH (see Materials and Methods). For each pulse, we smoothed and thresholded the NMY-2::RFP signal to identify a region of interest (ROI) containing high levels of NMY-2::RFP just before the onset of contraction (Figure S3A; Materials and Methods). We propagated this ROI forward and backwards in time (see Figure S3A, Materials and Methods), and then measured the mean intensities of the RFP and GFP signals within the ROI before, during and after the pulse (Figure S3B,C). We normalized these data with respect to the minimum (pre-contraction) and maximum intensities measured during this interval, then aligned data for multiple pulses with respect to the time point at which NMY-2::RFP reached 25% of its maximum intensity (Figure 4D, Materials and Methods). These aligned data confirm that sharp increases and decreases in RhoA activity precede, respectively, the appearance and disappearance of NMY-2::RFP (Figure 4D). On average, GFP::AHPH reaches 25% of its maximum intensity  $8.6 \pm 3.9$  seconds before NMY-2::RFP (Figure 4E), and falls below 75% of its maximum intensity  $11.1 \pm 3.5$  seconds before NMY-2::RFP (Figure 4F).

We used the same approach to align data for embryos co-expressing NMY-2::RFP and either the F-actin binding domain of Utrophin fused to GFP (GFP::UTR); a marker for F-actin (Burkel et al., 2007; Tse et al., 2012), or GFP::Anillin (Maddox et al., 2007). Using NMY-2::RFP as the common reference to co-align data for NMY-2::RFP, GFP::AHPH, GFP::UTR and GFP::Anillin,

we found that like Myosin II, F-actin and Anillin accumulate and dissipate during pulsed contractions with a significant delay relative to GFP::AHPH (Figure 4D-F, Figure S4A-D). Thus local activation and inactivation of RhoA precedes and times the accumulation and disappearance of its downstream targets.

Finally, we used the time points at which NMY-2::RFP intensities (Figure 4D) and single molecule densities of Myosin::GFP (Figure 3H) reached 25% of their peak values to align the time course of RhoA activation with respect to the onset of contraction as measured by single molecule imaging. This analysis shows that RhoA activity peaks just before the onset of contraction (indicated by red box in Figure 4D) and thus local concentration of active RhoA by advection-contraction (Munjal et al., 2015) cannot explain the rising phase of RhoA activation in *C. elegans* embryos. By extension, the same analysis reveals that RhoA activity peaks and begins to fall at a point where F-actin and Myosin II disappearance rates are at a minimum (Figure 3D,J); thus factors other than cortical actomyosin disassembly drive the disappearance of active RhoA at the end of a pulse.

Using the same two-color image analysis, we confirmed that pulses of RhoA activity accompany pulsed contractions in the zygote P0. To remove the potentially confounding effects of large scale cortical flows that occur during zygotic polarization, we performed these measurements in embryos depleted of the centrosomal factor SPD-5 (Munro et al., 2004; Hamill et al., 2002), which exhibit pulsed contractions but lack cortical flows. In *spd-5(RNAi)* P0 zygotes, as in wild

type AB cells, increases and decreases in local GFP::AHPH intensity preceded the rise and fall of NMY-2::RFP (Figure S5A-F) and to a lesser extent GFP::UTR (Figure S5D-F) and GFP::Anillin (Figure S4E-H). As in AB, the initial accumulation of GFP::AHPH was broad and diffuse while a more persistent pool of GFP::AHPH remained concentrated within punctae that co-localized with NMY-2::RFP within a more central region of the initial domain (yellow arrows in Figure S5B).

### **Pulsed activation of RhoA does not require Myosin II.**

Recent studies suggest that active RhoA and Myosin II accumulate with similar timing during pulsed apical contractions in the *Drosophila* germband, and that Myosin II activity is required for pulsed accumulation of active RhoA (Munjal et al., 2015). Our observation that active RhoA peaks before the onset of contraction rules out models in which local contraction concentrates RhoA, or its upstream activators, to initiate pulses. However, it remains possible that Myosin II activity is otherwise required for pulsed activation of RhoA. To test this possibility, we used RNAi to deplete the Myosin heavy chain NMY-2 in a strain co-expressing transgenic GFP::AHPH and NMY-2 tagged with mKate2 at the endogenous locus by CRISPR-mediated homologous recombination (NMY-2::mKate2, a kind gift of Dan Dickinson). We used RNAi against NMY-2 to deplete NMY-2::mKate2 to the point where only a few single NMY-2::mKate particles could be detected at the P0 cortex using imaging conditions that allow robust detection of single molecules (Figure 5A). Under these conditions, in *nmy-2(RNAi)* zygotes, we still observed transient focal accumulations of GFP::AHPH (Figure 5A,B Movie S6). These

accumulations were roughly similar in size and spacing to those observed in *spd-5 (RNAi)* zygotes during polarity establishment, and many occurred on patches of cortex in which fewer than two discrete particles of NMY-2::mKate were detected, excluding any possible contribution from contractile tension generated by Myosin II (Figure 5B). Aligning GFP::AHPH intensities vs time across many pulses in *nmy-2(RNAi)* zygotes revealed a mean time course for AHPH accumulation and dissipation that is comparable to that measured for the diffuse pool of GFP::AHPH in *spd-5(RNAi)* zygotes (Figure 5C). Indeed, pulses terminated more rapidly in *nmy-2(RNAi)* than in *spd-5(RNAi)* zygotes, implying that neither Myosin II activity nor its inhibition is required for rapid pulse termination. We conclude that Myosin II is not required for locally pulsatile activation of RhoA in *C. elegans* embryos, although myosin activity may shape spatiotemporal pulse dynamics (see Discussion).

### **RhoA feeds back locally to promote its own activity and this is required for pulse initiation.**

A recent study described propagating cortical waves of RhoA activity in echinoderm oocytes and frog embryos; these appear to be driven by locally excitable RhoA dynamics in which RhoA feeds back positively to promote its own activation and negatively, through local F-actin assembly, to promote delayed inactivation (Bement et al., 2015). We hypothesized that a similar combination of positive and negative feedbacks could drive local pulses of RhoA activity in *C. elegans* embryos. Plotting the rate of change in GFP::AHPH intensity vs intensity during the rising phase of individual pulses in either P0 or AB cells revealed a sharp increase in the rate of RhoA activation with increasing RhoA (Figure 6A). This is consistent with a scenario in which

active RhoA feeds back positively to promote further activation of RhoA. However, it could also reflect pulsed activation of RhoA (without feedback) by an upstream activator. To distinguish these possibilities, we used RNAi to progressively deplete embryos of RhoA. If the time course of RhoA activation is dictated by an upstream activator, we should observe pulsed accumulation of GFP::AHPH as long as it remains detectable at the cortex. In contrast, if positive feedback of RhoA onto itself drives pulse initiation, then there should be an abrupt loss of pulsing below a threshold level of RhoA. Consistent with the latter expectation, we observed an abrupt transition from pulsed to non-pulsed RhoA accumulation after ~ 12 hours of feeding (Figure 6B,C, Movie S7). In zygotes that lacked pulsed RhoA accumulation, we could still readily detect robust RhoA-dependent cortical flows (Motegi and Sugimoto, 2006; Schonegg and Hyman, 2006) during polarity establishment (dashed yellow lines in Figure 6B) and localized accumulation of active RhoA prior to cytokinesis (cyan arrowheads in Figure 6B). Together, these observations support the idea that RhoA feeds back positively to amplify its own activation and that sufficiently strong feedback is required to generate local pulses of high RhoA activity.

### **Delayed accumulation of the Rho GAPs RGA-3/4 underlies pulse termination.**

What terminates RhoA activity during each pulse? Our results imply that local termination of RhoA activity at the end of a pulses does not require Myosin II activity or (by extension) its local inhibition by Myosin phosphatase (Piekny and Mains, 2002; Piekny et al., 2003; Diogon et al., 2007), nor is it timed by cortical disassembly. Previous studies identified the redundant RhoA GAPs RGA-3 and RGA-4 as inhibitors of RhoA activity during polarization and cytokinesis (Schonegg et al., 2007; Zanin et al., 2013; Schmutz et al., 2007; Tse et al., 2012). A YFP-tagged

RGA-3 transgene accumulates at the cortex in early embryos (Schonegg et al., 2007), and simultaneous depletion of RGA-3 and RGA-4 leads to hyper activation of RhoA and hypercontractility during zygotic polarization (Schonegg et al., 2007; Schmutz et al., 2007; Tse et al., 2012). We wondered, therefore, if RGA-3/4 could provide negative feedback to terminate RhoA activity during individual pulses.

To test this possibility, we first imaged embryos co-expressing GFP::RGA-3 and NMY-2::mKATE. Focusing on AB, and using 2-color analysis as above, we confirmed that GFP::RGA-3 is present throughout the cortex, but accumulates locally during individual pulsed contractions (Figure 7A-C, Movie S8). Significantly, GFP::RGA-3 and NMY-2::mKATE accumulated with very similar timing (Figure 7B). Using NMY-2::mKATE and NMY-2::RFP as common signals to co-align data for GFP::AHPH and GFP::RGA-3, we inferred that, on average, GFP::RGA-3 accumulates with a ~6 sec delay relative to GFP::AHPH. The rate of RhoA activation peaks before the onset of GFP::RGA-3 accumulation, and rapid accumulation of GFP::RGA-3 coincides with deceleration and then reversal of RhoA activation (Figure 7C, bottom). Together, these observations suggest that delayed accumulation of RGA-3/4 plays a key role in terminating each pulse of RhoA activity. To test this further, we created a strain in which GFP::AHPH and NMY-2::mKATE were co-expressed in *rga-3;rga-4* (hereafter *rga-3/4*) double mutant embryos (Zanin et al., 2013). Consistent with previous reports (Schonegg et al., 2007; Zanin et al., 2013; Schmutz et al., 2007; Tse et al., 2012), during polarity establishment in P0 in *rga-3/4* double mutant embryos, we observed hyper-accumulation of GFP::AHPH and hypercontractility that was characterized by a sequence of convulsive contractions of the anterior cortex and rapid anterior directed cortical flows (Figure 7D, 2nd column, Movie S9). However,



we could no longer detect local pulses of GFP::AHPH in these embryos. In principle, this could be because rapid flows sequester factors required for pulsed contractility to the extreme anterior pole. To exclude this possibility, we used partial depletion of the myosin regulatory light chain (MLC-4) to attenuate contractility and cortical flows in *rga-3/4* double mutant zygotes or in control zygotes that were doubly heterozygous for *rga-3* and *rga-4* (Figure 7D, Movie S9). In control zygotes partially depleted of MLC-4, cortical flows were sharply reduced, but pulsed accumulation of GFP::AHPH could be readily detected (Figure 7D, 3rd column). By contrast, in *rga-3/4* double mutant zygotes partially depleted of MLC-4, cortical flows during polarity establishment phase were slower than observed in wild type embryos; GFP::AHPH was uniformly enriched, but we did not observe local pulses of GFP::AHPH accumulation (Figure 7D, 4th column, Movie S9). Together, these data suggest that negative feedback through delayed accumulation of RGA-3/4 plays a key role in terminating local pulses of RhoA activity.

Recent work suggests that F-actin accumulation mediates delayed inhibition of RhoA activity in echinoderm and frog oocytes and embryos (Bement et al., 2015). We wondered if F-actin might play a similar role in *C. elegans* embryos by mediating recruitment of RGA-3/4. Consistent with this possibility, two-color imaging of GFP::RGA-3 and mCherry::Lifeact (a marker for F-actin (Pohl et al., 2012)) revealed extensive co-localization of RGA-3 and F-actin in both P0 and AB (Figure 8A). A substantial fraction of GFP::RGA-3 co-localized with mCherry::Lifeact in extended linear structures that presumably represent actin filaments and/or small filament bundles. Treating permeabilized zygotes (Carvalho et al., 2011; Olson et al., 2012) with Latrunculin A to depolymerize F-actin lead to a profound loss of cortical GFP::RGA-3,

supporting the idea that F-actin plays a key role in recruiting RGA-3/4 to the cortex during individual pulses (Figure 8B).

### **Fast positive and delayed negative feedback involving RhoA and RGA-3/4 can account quantitatively for locally pulsatile RhoA dynamics.**

Our data suggest that locally excitable RhoA dynamics could arise independently of myosin activity through a combination of fast positive feedback on RhoA activity and delayed negative feedback via local recruitment of RGA-3/4 (Figure 9A). To ask if this combination of feedback loops is sufficient to generate locally pulsatile activity, we formulated a simple ordinary differential equation model, describing local rates of change in RhoA and RGA-3/4, based on the following assumptions: (a) RhoA is activated at a basal rate, and feeds back positively to promote further RhoA activation, (b) RhoA feeds forward through F-actin assembly to promote local, reversible, association of RGA-3/4 with the cortex and (c) RGA-3/4 acts as a GAP to promote local inactivation of RhoA. Consistent with our experimental observations (Figure 6A), we assumed that autoactivation of RhoA is a saturating function of RhoA activity, represented by a Hill function with Hill coefficient  $n = 1$ . We assumed that inactivation of RhoA by RGA-3/4 obeys Michaelis-Menten kinetics. To account for the observed delay between an increase in RhoA and the sharp onset of RGA-3/4 accumulation (Figure 7C), we assumed ultrasensitive dependence of RGA-3/4 accumulation rate on RhoA, with the steepness of the response governed by an exponent  $m$  (see Materials and Methods for mathematical details).

We set values for basal RhoA activation and RGA-3/4 recruitment rates based on the slow rates of increase in GFP::AHPH and GFP::RGA-3 observed before the sharp upswing of each pulse (Figure 7C). Then we estimated values for the model's remaining parameters by fitting the relationships between the local rates of RhoA activation and RGA-3/4 recruitment and the local densities of RhoA and RGA-3/4 inferred from averaged and co-aligned GFP::AHPH and GFP::RGA-3 intensities (Figure 7C; see Materials and Methods for details). For these choices of parameters, without any further adjustments, the model predicts oscillatory dynamics, with a pulse waveform that matches closely that measured for pulses in AB cells (Figure 9B,C).

Interestingly, the dynamics could be tuned by small decreases in the basal RhoA activation rate (Figure 9D) or small increases in the basal RGA-3/4 recruitment rate (not shown), into a regime in which the dynamics are excitable - i.e. there is a stable state and a transient local input is required to trigger a pulse of RhoA activity. (Figure 9D). This is consistent with our observations in *nmy-2(RNAi)* embryos that some patches of cortex are quiescent while others exhibit repeated pulses of activity at regular intervals (yellow arrows in Figure 5A). We conclude that a simple combination of positive and negative feedback loops, coupling local RhoA activity and RGA-3/4 accumulation, is in principle sufficient to explain pulsatile RhoA dynamics in early *C. elegans* embryos, independent of actomyosin contractility.

# Discussion

Pulsed contractility is a widespread mode of actomyosin contractility, but its mechanistic basis has remained poorly understood (Levayer and Lecuit, 2012; Gorfinkiel, 2016). Current models for pulsed contractility invoke mechanochemical feedback in which contractile forces produced by Myosin II couple in different ways with actomyosin assembly/disassembly to drive excitable or oscillatory dynamics. Proposed feedback mechanisms include tension-dependent motor binding kinetics (Ren et al., 2009; Effler et al., 2006; He et al., 2010; Luo et al., 2012), tension-dependent filament assembly/stabilization (Hayakawa et al., 2011; De La Cruz and Gardel, 2015) or disassembly (Machado et al., 2014), tension-dependent activation of Myosin II via e.g.  $\text{Ca}^{++}$  (Kapustina et al., 2008) or RhoA (Koride et al., 2014), or modes of feedback in which local contraction advects and concentrates actomyosin and/or its upstream activators (Bois et al., 2011; Kumar et al., 2014; Munjal et al., 2015). Here, we have identified a mechanism for pulse generation that does not require force production or redistribution of cortical factors by Myosin II. Using single molecule imaging and particle tracking analysis, we have shown that the rapid initial accumulation of F-actin and Myosin II begins well before the onset of contraction, at a time when the cortex is locally expanding; Redistribution of actomyosin by local contraction makes a minor contribution to the overall accumulation of actomyosin during each pulse. Instead, our data show that pulsed accumulation and disappearance of F-actin and Myosin II are determined primarily by local modulation of their assembly/recruitment and disassembly. Using two-color imaging, we have shown that during each pulse, active RhoA begins to accumulate well before its downstream targets F-actin, Myosin II and Anillin. Active RhoA nearly reaches its peak level before the onset of contraction (Figure 4D), and then it begins to disappear well

before its downstream targets. Significantly, locally pulsed activation of RhoA continues to occur on patches of cortex that contain only a few (1-2) particles of Myosin II, which presumably are insufficient to produce local contractile stress. Thus a Myosin-independent RhoA pulse-generator underlies pulsed contractility in early *C. elegans* embryos.

The pulses of RhoA activity described here and in other contexts (Munjal et al., 2015; Bement et al., 2015; Mason et al., 2016) are strikingly reminiscent of excitable behaviors found in other systems, such as action potentials in neuronal (Izhikevich, 2007) or cardiac cells (Luo and Rudy, 1991), or transient pulses of intracellular calcium release (Goldbeter, 1996), or pulses of actin assembly observed in motile cells (Weiner et al., 2007). Theoretical studies highlight two key ingredients for excitable dynamics: fast positive feedback and delayed negative feedback (Strogatz, 1994). The sharp acceleration of active RhoA accumulation that we observe during the early rising phase of individual pulses is a dynamical signature of fast positive feedback in which RhoA promotes its own activity. Stronger evidence that RhoA participates in a positive feedback loop that is essential for pulsing comes from our observation that depletion of RhoA below a certain threshold leads to an abrupt loss of pulsed contractions, while having minimal effects on other RhoA-dependent functions such as cortical flow during polarization (Motegi and Sugimoto, 2006; Schonegg and Hyman, 2006) or cytokinesis (Loria et al., 2012).

The mechanism for this feedback remains unclear. Because the initial acceleration of RhoA activation occurs before any visible accumulation of Myosin II, Anillin or F-actin, it is unlikely that accumulation of these downstream targets makes a significant contribution to

positive feedback. A more likely possibility is that RhoA feeds back through one or more of its upstream activators, such as ECT-2, CYK-4 and NOP-1 (Tse et al., 2012). For example, during cytokinesis, active RhoA can act as a cofactor to promote trans-activation of the RhoGEF ECT-2 by the RhoGAP CYK-4 (Zhang and Glotzer, 2015). While CYK-4 is not required for pulsed activation of RhoA during polarization (Tse et al., 2012), it is possible that RhoA could feedback through NOP-1, a protein of unknown activity that is required for RhoA activation during interphase in P0 and AB (Tse et al., 2012). Identifying the molecular mechanism(s) for this feedback is an important goal for future studies.

Our data suggest that the redundantly acting RhoGAPs RGA-3/4 play a key role in providing the delayed negative feedback that terminates RhoA pulses. RGA-3/4 act as GAPs towards RHO-1 in vitro (Schonegg et al., 2007), and loss of RGA-3/4 leads to hyperactivation of RhoA in vivo (Tse et al., 2012). We find that during each pulse, RGA-3 accumulates with a delay of ~6 seconds relative to active RhoA. Significantly, *the rate* of active RhoA accumulation peaks, and begins to fall, just as GFP::RGA-3 begins to accumulate, suggesting that rapid accumulation of RGA-3/4 plays a key role in timing the end of each RhoA pulse. Consistent with this possibility, pulsatile RhoA activation is completely abolished in *rga-3/4* double mutant zygotes, even when contractility is attenuated to prevent sequestration of RhoA activators by hyperactive cortical flow. A similar dependence of pulsatility on a RhoA GAP has recently been reported in the context of ventral furrow invagination in *Drosophila* (Mason et al., 2016).

Together, these data suggest a model for locally excitable RhoA dynamics in which RhoA feeds back positively to promote its own activation, and feeds back negatively with a delay through RGA-3/4 to promote its own inactivation. Indeed, when we formulate this model mathematically, and constrain model parameter values to match the local dependencies of RhoA and RGA-3/4 accumulation rates on levels of RhoA and RGA-3/4 inferred from two-color imaging data, the model predicts locally pulsatile RhoA dynamics, and small tunings of the model's parameters mediate interconversion between excitable dynamics and spontaneous oscillations. This simple modeling exercise establishes an internally consistent hypothesis for pulsatile contractility that can be confirmed and extended by future experiments.

What governs the recruitment of RGA-3/4 during each pulse? We have found that GFP::RGA-3 co-localizes broadly and extensively with cortical F-actin in both P0 and AB. RGA-3/4 accumulates with the same timing as F-actin during each pulse, and depolymerizing F-actin abolishes this accumulation. This suggests a specific mechanism for delayed recruitment of RGA-3/4 in which RhoA promotes increased local F-actin assembly (potentially through the formin Cyk-1 (Severson et al., 2002)), and F-actin in turn recruits RGA-3/4. Interestingly, a recent study (Bement et al., 2015) suggests that RhoA and cortical F-actin form an excitable circuit, with RhoA as activator and F-actin as inhibitor, that propagates cortical waves of RhoA activity and F-actin assembly in oocytes and embryonic cells of frogs and echinoderms. The mechanism(s) by which F-actin feeds back to inactivate RhoA in these cells remains unknown, but our observations in *C. elegans* support to the idea, proposed by Bement et al, 2015, that a RhoGAP homologous (or analogous) to RGA-3/4 may be recruited by F-actin to mediate

negative feedback in frog and echinoderm cells. A similar circuit design may underlie the propagation of actin waves observed in many motile cells (reviewed in (Allard and Mogilner, 2013)).

It is also interesting to compare our observations to those made recently in the *Drosophila* germband (Munjal et al., 2015). In germband cells, pulsed accumulation of a RhoA biosensor appears to coincide with the local accumulation of F-actin and Myosin II, and with the onset of contraction, and it is abolished by inhibition of Rho Kinase, an upstream activator of Myosin II. In *C. elegans*, by contrast, pulsed accumulation of the analogous biosensor (based on a fragment of Anillin that binds active RhoA) precedes actomyosin accumulation and the onset of contraction by many seconds and persist in the almost complete absence of Myosin II.

To some extent, these differences could reflect the imaging methods used to detect the RhoA biosensor. Using near-TIRF imaging in *C. elegans* embryos, we detect two pools of the biosensor: a diffuse pool that begins to accumulate well before Myosin II, and a second more punctate pool whose distribution strongly overlaps with Myosin II (Figure 4B, Figure S3F&G, Figure S5). Based on studies in other cells (Weiner et al., 2007), the diffuse pool may be more difficult to detect using confocal microscopy. Thus it remains possible that a diffuse pool of active RhoA accumulates before actomyosin in the *Drosophila* germband, but escapes detection by confocal microscopy.



An alternative idea is that pulsed contractility is governed locally excitable RhoA dynamics in both systems, but that different forms of positive feedback may contribute differently to driving the rapid upswing of RhoA activity, and that different mechanisms may operate to trigger pulses (by driving RhoA activity above a threshold for excitation). For example, in the *Drosophila* germband, a mode of feedback in which local contraction advects and concentrates active RhoA (or upstream activators) may be required to initiate pulses, whereas in *C. elegans*, local fluctuations in RhoA or RGA-3/4 levels may be sufficient to do so in the absence of contractility. Importantly, in the *Drosophila* germband, as in *C. elegans*, advection/contraction coupling accounts for only a fraction of the total accumulation of active RhoA during each pulse; thus other modes of positive feedback must also make a significant contribution.

More generally, we hypothesize that the different modes of RhoA excitability that have been described in frog, echinoderm, *C. elegans* and *Drosophila* embryos share a deeper underlying mechanistic origin. We suggest that a comparative analysis of mechanisms for pulsing in these and other systems will be a very fruitful way to uncover core conserved circuitry for pulse generation and to understand the ways in which this core circuitry is tuned or accessorized in different contexts to achieve different functional outcomes.

# Materials and Methods

## *C. elegans* culture and strains

We cultured *C. elegans* strains at 22°C under standard conditions (Brenner, 1974) Table S1 lists the mutations and transgenes used in this study. Unless otherwise specified, strains were provided by the Caenorhabditis Genetics Center, which is funded by the National Institutes of Health (NIH) National Center for Research Resources.

## RNA interference.

RNAi was performed by the feeding method as previously described (Timmons et al., 2001). Bacteria targeting *nmy-2*, *spd-5*, *rho-1*, *perm-1*, *arx-2* and *mlc-4* were obtained from the Kamath feeding library (Kamath et al., 2003). The L4417 plasmid targeting the entire GFP sequence (generated by the Fire lab and available at <http://www.addgene.org/1649/>) was transformed into HT115(DE3) bacteria. For the Myosin depletion experiments, L4 larvae co-expressing GFP::AHPH and NMY-2::mKate2 were transferred to *nmy-2* RNAi feeding plates 24-30 hours before imaging. Strong depletion of myosin was verified by strong loss of cortical NMY-2::mKate2. For experiments involving *spd-5* RNAi, L4 larvae were transferred to feeding plates for 24-30 hours before imaging. For the RhoA depletion experiments, synchronized young adults were transferred to *rho-1* RNAi plates 8-16 hours before imaging. For experiments involving *mlc-4* RNAi, synchronized young adults were transferred to feeding plates for 12-16 hours before imaging. For the latrunculin A experiments, late L4 larvae were transferred to *perm-1* RNAi plates 16-24 hours before imaging. For experiments involving *arx-2* RNAi, L4 larvae were transferred to feeding plates for 30-36 hours before imaging.

## **Microscopy.**

We mounted embryos as described previously (Robin et al., 2014) on glass slides under #1.5 coverslips in 3-5 $\mu$ l of standard Egg Salts containing ~100 uniformly sized polystyrene beads ( $18.7 \pm 0.03$   $\mu$ m diameter, Bangs labs, #NT29N). The beads acted as spacers and allowed us to achieve uniform compression of the embryo surface across experiments (Robin et al., 2014).

We performed all imaging on a Nikon ECLIPSE-Ti inverted microscope equipped with a Ti-ND6-PFS Perfect Focus Unit. A laser merge module (Spectral Applied Research) controlled fast, tunable delivery of 481nm and 561 nm laser excitation from 50mW solid state lasers (Coherent Technology) to a motorized TIRF illuminator. We adjusted laser illumination angle to achieve near-TIRF illumination (Tokunaga et al., 2008). We collected images using a Nikon CFI Apo 1.45 NA oil immersion TIRF objective combined with 1.5 intermediate magnification onto an Andor iXon3 897 EMCCD camera. All image acquisition was controlled using Metamorph software.

## **Single-molecule imaging**

We performed single molecule imaging as described previously (Robin et al., 2014). For NMY-2::GFP, we used a combination of RNAi against GFP and mild photobleaching in wide field illumination mode to reduce surface densities of GFP-tagged transgenic proteins to single molecule levels. For GFP::Actin, which is expressed at very low levels in the strain that we used, we used mild photobleaching alone. For GFP::Actin and NMY-2::GFP, we imaged single molecules using 10% laser power ( $\sim 0.16$   $\mu$ W. $\mu$ m<sup>-2</sup>), with 100ms exposures in continuous

streaming mode (GFP::Actin and NMY-2::GFP), yielding an approximate photobleaching rate of  $\sim 0.05 \text{ s}^{-1}$  (Robin et al., 2014).

## **Analysis of F-actin and Myosin II turnover**

In previous work, we compared two methods for estimating local F-actin disassembly rates from single molecule data (Robin et al., 2014). The first method (smPreSS) estimates average disassembly rates in a local region by fitting kinetic models to the approximately exponential decay in particle densities measured during photobleaching, assuming steady state conditions. The second method relies on single molecule detection and tracking and infers appearance and disappearance events directly from single molecule trajectories. We showed that under steady state conditions, and when Myosin II is inhibited to remove the effects of local contraction and cortical flow, these two methods yield estimates of local disassembly that agree to within 20%. During pulsed contractions, the steady state assumption is not valid and the effects of cortical flow cannot be ignored. Therefore, in this work, we relied exclusively on the particle tracking method to measure local appearance, disappearance and motion of single molecules.

In preliminary analyses, we found that single molecules of GFP::Actin and NMY-2::GFP move sufficiently slowly during pulsed contractions that we could obtain marginally better results by pre-averaging ten consecutive frames of raw data to produce sequences of images at one-second intervals. We performed single molecule detection and tracking on this pre-averaged data using a Matlab implementation (<http://people.umass.edu/kilfoil/downloads.html>) of the Crocker-Grier

method (Crocker and Grier, 1996; Pelletier et al., 2009). We then inferred single molecule appearance and disappearance events and frame-to-frame single molecule displacements directly from the single molecule trajectories.

### **Measuring local deformations from single molecule data**

The key goal of our single molecule analysis was to distinguish the relative contributions of local assembly/disassembly and local deformation/flow to changes in local density during pulsed contractions. To do so, it was essential to follow dynamic changes in assembly/disassembly on a moving and contracting patch of cortex, i.e. in a material (Lagrangian) frame of reference. We used single molecule displacements to identify and track regions of cortex undergoing pulsed contractions as follows:

#### **Tracking a polygonal region of interest (ROI) during individual pulses.**

For each pulse, we identified a reference time point at/near the onset of contraction by visual inspection of the time lapse sequence. At this time point, we identified manually an elliptical region containing the patch of cortex undergoing contraction (Figure S1A). We computed the smallest polygon (the “convex hull”) containing all the particles detected within the elliptical region (Figure S1B). Each vertex of the reference polygon was thus associated with a single molecule detected on the cell surface. To propagate the polygonal ROI forwards and backwards in time, we computed the frame-to-frame displacement of each of its vertices, either from the displacement of a vertex-associated molecule or (once the molecule disappears) from a weighted

average of the frame-to-frame displacements of nearby particles (Figure S1C). We then measured local deformation and turnover within this polygonal ROI as follows:

### Measuring local deformation and turnover during individual pulses

We compared three different measures of local compression (or dilation) within the polygonal ROI from frame to frame (Figure S2A): the change in normalized surface area, a particle-based strain rate and a material strain rate. We computed the change in surface area  $s_A$  as the time-derivative of the normalized area of the polygonal ROI:

$$s_A(t) = \frac{A_{t+1} - A_t}{\langle A \rangle},$$

where  $\langle A \rangle$  is the mean surface area taken over all frames in the pulse sequence. To compute a particle-based strain rate, for each particle in the polygonal ROI, we computed the average normalized change in distance between that particle and its near-neighbors:

$$s_P^i(t) = \frac{1}{M} \left( \sum_{j=1 \dots M} \frac{d_{ij}^{t+1} - d_{ij}^t}{d_{ij}^t} \right)$$

where  $d_{ij}^t$  is the distance between particle  $i$  and a near neighbor particle  $j$  at time  $t$  and the sum is taken over all neighbor particles within a disk of radius 20 pixels centered on particle  $i$ . We then averaged over all particles in the ROI to obtain a particle-based strain rate for the entire ROI:

$$s_p(t) = \frac{1}{N} \left( \sum_{i=1 \dots N} s_p^i(t) \right)$$

Finally, to compute a material strain rate  $s_M$ , we used a linear least squares regression method to estimate the local gradient of particle velocities (Landau and Lifshitz, 1987). We then decomposed the resulting velocity gradient tensor into anti-symmetric (rotation) and symmetric (strain rate) components. We then took one half the trace of the symmetric strain rate tensor as a measure of local compressive strain. In practice, we found that all three methods yielded very similar results regarding the magnitude and timing of contractions (Figure S2A). We report results based on the particle-based strain rate in Figures 2 and 3.

## Measuring turnover

To quantify turnover rates for F-actin or Myosin II within the polygonal ROI, for each time point  $t$ , we measured the area of the ROI ( $A_t$ ), the number of particles  $N_t$ , their density  $D_t = \frac{N_t}{A_t}$ , and the number of appearance and disappearance events that occurred within the ROI between time  $t$  and  $t+\Delta t$  ( $\Delta N_t^+$ ,  $\Delta N_t^-$ ). We quantified the mean appearance rate and the mean disappearance rates within the ROI as:  $k_t^+ = \frac{\Delta N_t^+}{\Delta t}$  and  $k_t^- = \frac{\Delta N_t^-}{N_t \Delta t}$ . We computed the change in actin density

within a polygonal ROI at time  $t$  as  $\Delta D_t = D_{t+\Delta t} - D_t$ . We estimated the contribution to the

change in density from deformation of the ROI to be  $\Delta D_{\text{deformation}} = -D_t \frac{A_{t+\Delta t} - A_t}{A_{t+\Delta t}}$  and the

contribution from turnover (i.e. a net imbalance of appearance and disappearance) to be

$\Delta D_{\text{turnover}} = \frac{N_{t+\Delta t} - N_t}{A_{t+\Delta t}}$ , such that  $\Delta D_t = \Delta D_{\text{deformation}} + \Delta D_{\text{turnover}}$ . We note that this method for

measuring the differential contributions of deformation and turnover to changes in density does not rely on single molecule tracking and is thus insensitive to tracking errors.

## Two-color imaging, pulse tracking, and analysis

We performed two-color imaging using the imaging system described above with near-TIRF illumination. We performed the initial steps of image processing, pulse identification and extraction, using the software package ImageJ (<http://imagej.nih.gov/ij/>). For all subsequent steps, including pulse tracking, intensity measurements, data normalization and alignment across multiple pulses, we used custom functions written in MATLAB (<http://www.mathworks.com>).

We imaged embryos co-expressing GFP- and RFP-tagged transgenes by alternating 100 ms exposures with 488nm and 561nm excitation, thus giving 5 two-color frames per second. We used 25% maximum laser power ( $\approx 0.4 \mu W \mu m^{-2}$ ) for each channel. For subsequent analysis, we averaged over five consecutive frames to obtain a single image for each channel at one-second intervals. We limited our analysis to individual pulses that moved very little during the period



leading up to the onset of contraction. We used ImageJ to extract a subregion containing each pulse of interest. With the exception of Myosin-depleted embryos, we used NMY-2::RFP as a reference signal to track the location of the pulse through time. For the analysis of Myosin-depleted embryos, we used GFP::AHPH as the reference signal.

We used the reference signal to identify and track a moving region of interest associated with each pulse as follows (Figure S4A): First, we smoothed each frame of the image sequence using a gaussian filter,  $\sigma = 2-3 \mu\text{m}$ ). We then thresholded the smoothed image to identify regions of interest (ROIs) associated with the pulse in consecutive frames. We used the same value of  $\sigma$  and the threshold for all frames and chose these values such that each ROI in the sequence was simply connected and such that the largest ROI in the sequence was approximately the same size as the region of strong signal accumulation near the peak of the pulse in the unprocessed data, as viewed by eye.

To measure signal intensity vs time during a pulse, we first used MATLAB to determine the centroid of each ROI to obtain a sequence of centroid positions  $C_t = (x_t, y_t)$ . We then extended this sequence backwards in time using the first measured centroid position  $C_{first}$  and extended it backwards in time using the last measured centroid position  $C_{last}$ . We then used a single reference ROI, centered on positions  $[C_{first-N}, \dots, C_{last+N}]$ , to measure a sequence of GFP and RFP intensities over time. We compared three different reference ROIs: (i) the largest ROI measured in the sequence, which corresponds roughly to peak accumulation of Myosin II, (ii) a

“bounding box” = the smallest square region containing the largest ROI, and (iii) an annular region obtained by subtracting the largest ROI from the bounding box.

We normalized the intensity data for individual pulses using the equation

$$I_{norm}(t) = \frac{I_{mean}(t) - I_{min}}{I_{max} - I_{min}}, \text{ where } I_{mean}(t) \text{ is the mean intensity of the ROI at time } t, I_{min} \text{ is the}$$

minimum mean intensity of the ROI before the onset of contraction, and  $I_{max}$  is the maximum mean intensity of the ROI measured over the entire sequence  $[C_{first-N}, \dots, C_{last+N}]$ . Finally, we aligned data across multiple pulses with respect to the time point at which NMY-2::RFP crossed 25% of its normalized maximum intensity (Figure S4). The mean was calculated with a 95% confidence interval.

We performed a number of additional controls to assess the sensitivity of our results to variation across strains, or the details of pulse identification, tracking and intensity measurements. First, we compared the kinetics of Myosin II accumulation during pulses in embryos co-expressing NMY-2::GFP and NMY-2::RFP and confirmed that the dynamics of accumulation were essentially identical after normalizing for differences in expression level and probe brightness (Figure 4E,4F, Figure S3D,S3E). Second, we confirmed that the the dynamics of Myosin::RFP accumulation was essentially identical across the different two-color strains that we used (Figure S3D ; Figure S3E). Finally, we verified that our measurements of the rate and relative timing of accumulation of different signals were largely insensitive to differences in the size of the box/ blobs used (Figure S3, data not shown).

## **Kymograph analysis**

To produce the kymographs shown in Figures 4-7 and Figure S4, we aligned images so that the AP axis of the embryo coincided with the horizontal (x) image axis. We selected rectangular regions aligned with the x image axis, whose width (in x) coincided with the embryonic region of interest and whose height (in y) was 10-20 pixels. From the original image stack, we extracted an xyt substack corresponding to this rectangular region; we used ImageJ's reslice tool to reslice this stack with respect to the xt plane, then we used a maximum intensity projection to collapse the individual slices in y to obtain a kymograph in x vs t.

## **Kinetic analysis**

For the kinetic analysis (Figure 6A), normalized intensity values were first smoothed using custom MATLAB software. The time derivatives of  $d[\text{AHPH}]/dt$  were calculated from smoothed normalized intensity values using MATLAB's built in difference method. The data were then binned, and the average and standard deviation were calculated per bin.

We built a simple ordinary differential equation model for RhoA pulse generation at a single point in space based on autocatalytic activation of RhoA and delayed negative feedback via RhoA-dependent recruitment of RGA-3/4. We started with the following assumptions:

- (1) RhoA is activated at a constant basal rate.
- (2) Active RhoA feeds back to promote further RhoA activation at a rate that can be described as a Hill function of RhoA density.

- (1) RGA-3 and RGA-4 can be treated as a single species (RGA-3/4) that acts as a GAP to promote local inactivation of RhoA.
- (2) Active RhoA promotes local F-actin assembly; RGA-3/4 binds F-actin from an abundant cytoplasmic pool, and dissociates from F-actin at a constant rate. Because RGA-3 and F-actin accumulate with very similar kinetics, we did not model F-actin directly. Instead, we assumed that RGA-3/4 binds the cortex at a constant basal rate plus a rate that depends on the local density of active RhoA, and that RGA-3/4 dissociates from the cortex at a constant rate.
- (3) To capture the observed delay between the sharp upswing in RhoA activity and the onset of F-actin and RGA-3/4 accumulation (Figure 4D, Figure 7B), we assumed ultrasensitive dependence of RGA-3/4 recruitment rate on RhoA activity.

With these assumptions, letting  $p$  represent the density of RhoA and  $r$  represent the density of RGA-3/4, we write a pair of ordinary differential equations (ODEs) for  $p$  and  $r$ :

$$(1) \quad \begin{aligned} \frac{dp}{dt} &= k_p^0 + k_p^{fb} \frac{p^n}{K_{fb} + p^n} - k_{GAP} r \frac{p}{K_{GAP} + p} \\ \frac{dr}{dt} &= k_r^0 + k_r^{ass} p^m - k_r^{diss} r \end{aligned}$$

To estimate the values for model parameters, we extracted empirical relationships between RGA-3/4, active RhoA and their time derivatives from intensity data for GFP::RGA-3 and GFP::AHPH that was normalized, averaged and aligned over many individual pulses, and then co-aligned using Myosin::RFP as a common reference (Materials and Methods, Figure 7B). Then

we used these data to constrain the values of parameters in equations (1) as follows. First, we set  $n = 1$ , based on the observed form of dependence of  $\frac{dAHPH}{dt}$  on AHPH in Figure 6A, and

we set values for basal RhoA activation ( $k_p^0 = 0.006$ ) and basal RGA-3/4 recruitment

( $k_r^0 = 0.005$ ) based on the slow rates of increase in GFP::AHPH and GFP::RGA-3 observed

before the sharp upswing of each pulse. Then, we used a non-linear least squares regression to fit the right hand sides of equations (1) to the intensity data, to estimate values for the remaining parameters.

In our initial efforts to fit the equation for RhoA, the values estimated for  $K_{GAP}$  were consistently negative and very close to zero, corresponding to a scenario in which RGA-3/4 operates near saturation on active RhoA. Therefore, in all subsequent analyses, we set  $K_{GAP}$  to a small constant positive value ( $K_{GAP} = 0.001$ ) and used non-linear least squares fits to choose values for  $k_p^{fb}$  and  $K_{fb}$  as described above.

For each set of parameters determined as above, we set the initial values for  $r$  and  $p$  to zero, simulating a scenario in which RhoA is minimally active and a small perturbation reduces RGA-3/4 to a minimally observed level. We then solved the equations numerically using Matlab to determine if this initial perturbation would result in either a single pulse of RhoA activity,

followed by a return to a stable inactive state (excitability) or a train of pulses (oscillatory dynamics).

## **Index of Supplementary Information**

### **Supplementary Figures:**

**Figure S1.** Schematic overview of methods for tracking a moving and deforming patch of cortex from single molecule data.

**Figure S2.** Comparison of different methods to quantify local deformation (strain rate) and to align data across multiple pulses.

**Figure S3.** Schematic overview of methodology for measuring and aligning fluorescence intensities from two-color data during pulsed contractions.

**Figure S4.** Two color analysis of Myosin II and Anillin dynamics during pulsed contractions in one- and two-cell embryos.

**Figure S5.** Two color analysis of pulsed contractions in P0.

### **Supplementary Movies:**

**Movie S1.** Actomyosin pulse dynamics in a wild type cells expressing GFP::UTR and NMY-2::RFP.

**Movie S2.** Two cell embryo expressing GFP::ACT-1 at single molecule levels and imaged in near-TIRF mode.

**Movie S3.** Dynamic tracking of a cortical patch from single molecule data.

**Movie S4.** Two cell embryo expressing NMY-2::GFP at single molecule levels and imaged in near-TIRF mode.

**Movie S5.** Pulse dynamics in a two-cell embryo expressing GFP::AHPH and NMY-2::RFP.

**Movie S6.** Pulse dynamics in a zygote expressing GFP::AHPH and NMY-2::mKate and subjected to strong *nmy-2* RNAi.

**Movie S7.** Pulse dynamics in zygotes expressing GFP::AHPH and subjected to *rho-1* RNAi for different periods of time.

**Movie S8.** Dynamics of GFP::RGA-3 and NMY-2::RFP accumulation during pulsing in AB cells.

**Movie S9.** Absence of RhoA pulsing in *rga-3*; *rga-4* double mutants.

**Movie S10.** F-actin recruits RGA-3 to the cortex.

## Acknowledgements

We thank Amy Maddox, Katrina Longhini (Glotzer lab), Dan Dickinson, Esther Zanin and Karen Oegema for worm strains, Michael Glotzer, Margaret Gardel, Chip Ferguson, and members of the Munro lab for valuable discussions, and Katrina Longini for technical assistance.

This work was supported by the US National Institutes of Health R01 grant GM09844 (to E.M.M.) and by the National Institute Of General Medical Sciences of the National Institutes of Health under Award Number T32GM007197 (to J.B.M.). The content is solely the responsibility of the authors and does not necessarily represent the official views of the National Institutes of Health.



## Abbreviations List

AB, anterior blastomere in the two-cell stage *C. elegans* embryo

AHPH, active RhoA binding domain of Anillin

GAP, GTPase Activating Protein

NMY-2, non-muscle myosin heavy chain

P0, one-cell *C.elegans* embryo, or zygote

TIRF, total internal reflection

UTR, F-actin binding domain of Utrophin

# References

- Allard, J., and A. Mogilner. 2013. Traveling waves in actin dynamics and cell motility. *Curr. Opin. Cell Biol.* 25:107–115. doi:10.1016/j.ceb.2012.08.012.
- Bement, W.M., M. Leda, A.M. Moe, A.M. Kita, M.E. Larson, A.E. Golding, C. Pfeuti, K.-C. Su, A.L. Miller, A.B. Goryachev, and G. von Dassow. 2015. Activator-inhibitor coupling between Rho signalling and actin assembly makes the cell cortex an excitable medium. *Nat. Cell Biol.* 17:1471–1483. doi:10.1038/ncb3251.
- Blanchard, G.B., S. Murugesu, R.J. Adams, A. Martinez-Arias, and N. Gorfinkiel. 2010. Cytoskeletal dynamics and supracellular organisation of cell shape fluctuations during dorsal closure. 137:2743–2752. doi:10.1242/dev.045872.
- Bois, J.S., F. Jülicher, and S.W. Grill. 2011. Pattern formation in active fluids. *Phys. Rev. Lett.* 106:028103. doi:10.1103/PhysRevLett.106.028103.
- Bornens, M., M. Paintrand, and C. Celati. 1989. The cortical microfilament system of lymphoblasts displays a periodic oscillatory activity in the absence of microtubules: implications for cell polarity. *J. Cell Biol.* 109:1071–1083.
- Brenner, S. 1974. The genetics of *Caenorhabditis elegans*. *Genetics*. 77:71–94.
- Burkel, B.M., G. von Dassow, and W.M. Bement. 2007. Versatile fluorescent probes for actin filaments based on the actin-binding domain of utrophin. *Cell Motil. Cytoskeleton*. 64:822–832. doi:10.1002/cm.20226.

- Carvalho, A., S.K. Olson, E. Gutierrez, K. Zhang, L.B. Noble, E. Zanin, A. Desai, A. Groisman, and K. Oegema. 2011. Acute drug treatment in the early *C. elegans* embryo. *PLoS ONE*. 6:e24656. doi:10.1371/journal.pone.0024656.
- Chen, Q., S. Nag, and T.D. Pollard. 2012. Formins filter modified actin subunits during processive elongation. *J. Struct. Biol.* 177:32–39. doi:10.1016/j.jsb.2011.10.005.
- Crocker, J., and D.G. Grier. 1996. Methods of digital video microscopy for colloidal studies. 179:298–310.
- David, D.J.V., A. Tishkina, and T.J.C. Harris. 2010. The PAR complex regulates pulsed actomyosin contractions during amnioserosa apical constriction in *Drosophila*. 137:1645–1655. doi:10.1242/dev.044107.
- De La Cruz, E.M., and M.L. Gardel. 2015. Actin Mechanics and Fragmentation. *J. Biol. Chem.* 290:17137–17144. doi:10.1074/jbc.R115.636472.
- Dierkes, K., A. Sumi, J. Solon, and G. Salbreux. 2014. Spontaneous oscillations of elastic contractile materials with turnover. *Phys. Rev. Lett.* 113:148102. doi:10.1103/PhysRevLett.113.148102.
- Diogon, M., F. Wissler, S. Quintin, Y. Nagamatsu, S. Sookhareea, F. Landmann, H. Hutter, N. Vitale, and M. Labouesse. 2007. The RhoGAP RGA-2 and LET-502/ROCK achieve a balance of actomyosin-dependent forces in *C. elegans* epidermis to control morphogenesis. 134:2469–2479. doi:10.1242/dev.005074.

- Effler, J.C., Y.-S. Kee, J.M. Berk, M.N. Tran, P.A. Iglesias, and D.N. Robinson. 2006. Mitosis-specific mechanosensing and contractile-protein redistribution control cell shape. *Curr. Biol.* 16:1962–1967. doi:10.1016/j.cub.2006.08.027.
- Fernandez-Gonzalez, R., S. de M. Simoes, J.-C. Röper, S. Eaton, and J.A. Zallen. 2009. Myosin II dynamics are regulated by tension in intercalating cells. *Dev. Cell.* 17:736–743. doi:10.1016/j.devcel.2009.09.003.
- Goldbeter, A. 1996. *Biochemical Oscillations and Cellular Rhythms: The Molecular Bases of Periodic and Chaotic Behavior*. Cambridge Univ. Press, Cambridge, UK.
- Gorfinkiel, N. 2016. From actomyosin oscillations to tissue-level deformations. *Dev Dyn.* 245:268–275. doi:10.1002/dvdy.24363.
- Hamill, D.R., A.F. Severson, J.C. Carter, and B. Bowerman. 2002. Centrosome maturation and mitotic spindle assembly in *C. elegans* require SPD-5, a protein with multiple coiled-coil domains. *Dev. Cell.* 3:673–684.
- Hayakawa, K., H. Tatsumi, and M. Sokabe. 2011. Actin filaments function as a tension sensor by tension-dependent binding of cofilin to the filament. *J. Cell Biol.* 195:721–727. doi:10.1083/jcb.201102039.
- He, L., X. Wang, H.L. Tang, and D.J. Montell. 2010. Tissue elongation requires oscillating contractions of a basal actomyosin network. *Nat. Cell Biol.* 12:1133–1142. doi:10.1038/ncb2124.

- Izhikevich, E.M. 2007. Dynamical systems in neuroscience : the geometry of excitability and bursting. MIT Press, Cambridge, Mass., London.
- Jaffe, A.B., and A. Hall. 2005. Rho GTPases: biochemistry and biology. *Annu. Rev. Cell Dev. Biol.* 21:247–269. doi:10.1146/annurev.cellbio.21.020604.150721.
- Kamath, R.S., A.G. Fraser, Y. Dong, G. Poulin, R. Durbin, M. Gotta, A. Kanapin, N. Le Bot, S. Moreno, M. Sohrmann, D.P. Welchman, P. Zipperlen, and J. Ahringer. 2003. Systematic functional analysis of the *Caenorhabditis elegans* genome using RNAi. *Nature*. 421:231–237. doi:10.1038/nature01278.
- Kapustina, M., G.E. Weinreb, N. Costigliola, Z. Rajfur, K. Jacobson, and T.C. Elston. 2008. Mechanical and biochemical modeling of cortical oscillations in spreading cells. *Biophys. J.* 94:4605–4620. doi:10.1529/biophysj.107.121335.
- Kapustina, M., T.C. Elston, and K. Jacobson. 2013. Compression and dilation of the membrane-cortex layer generates rapid changes in cell shape. *J. Cell Biol.* 200:95–108. doi:10.1083/jcb.201204157.
- Kasza, K.E., and J.A. Zallen. 2011. Dynamics and regulation of contractile actin-myosin networks in morphogenesis. *Curr. Opin. Cell Biol.* 23:30–38. doi:10.1016/j.ceb.2010.10.014.
- Kim, H.Y., and L.A. Davidson. 2011. Punctuated actin contractions during convergent extension and their permissive regulation by the non-canonical Wnt-signaling pathway. *J. Cell. Sci.* 124:635–646. doi:10.1242/jcs.067579.

- Koride, S., L. He, L.-P. Xiong, G. Lan, D.J. Montell, and S.X. Sun. 2014. Mechanochemical regulation of oscillatory follicle cell dynamics in the developing *Drosophila* egg chamber. *Mol. Biol. Cell.* 25:3709–3716. doi:10.1091/mbc.E14-04-0875.
- Kumar, K.V., J.S. Bois, F. Jülicher, and S.W. Grill. 2014. Pulsatory Patterns in Active Fluids. *Phys. Rev. Lett.* 112:208101 EP –.
- Landau, L.D., and E.M. Lifshitz. 1987. Fluid Mechanics, Second Edition: Volume 6 (Course of Theoretical Physics). Butterworth-Heinemann.
- Levayer, R., and T. Lecuit. 2012. Biomechanical regulation of contractility: spatial control and dynamics. *Trends Cell Biol.* 22:61–81. doi:10.1016/j.tcb.2011.10.001.
- Levayer, R., and T. Lecuit. 2013. Oscillation and polarity of E-cadherin asymmetries control actomyosin flow patterns during morphogenesis. *Dev. Cell.* 26:162–175. doi:10.1016/j.devcel.2013.06.020.
- Loria, A., K.M. Longhini, and M. Glotzer. 2012. The RhoGAP domain of CYK-4 has an essential role in RhoA activation. *Curr. Biol.* 22:213–219. doi:10.1016/j.cub.2011.12.019.
- Luo, C.H., and Y. Rudy. 1991. A model of the ventricular cardiac action potential. Depolarization, repolarization, and their interaction. *Circ. Res.* 68:1501–1526.
- Luo, T., K. Mohan, V. Srivastava, Y. Ren, P.A. Iglesias, and D.N. Robinson. 2012. Understanding the cooperative interaction between myosin II and actin cross-linkers mediated by actin

- filaments during mechanosensation. *Biophys. J.* 102:238–247. doi:10.1016/j.bpj.2011.12.020.
- Machado, P.F., G.B. Blanchard, J. Duque, and N. Gorfinkiel. 2014. Cytoskeletal turnover and Myosin contractility drive cell autonomous oscillations in a model of *Drosophila* Dorsal Closure. *Eur. Phys. J. Spec. Top.* 223:1391–1402. doi:10.1140/epjst/e2014-02197-7.
- Maddox, A.S. 2005. Distinct roles for two *C. elegans* anillins in the gonad and early embryo. 132:2837–2848. doi:10.1242/dev.01828.
- Maddox, A.S., L. Lewellyn, A. Desai, and K. Oegema. 2007. Anillin and the septins promote asymmetric ingression of the cytokinetic furrow. *Dev. Cell.* 12:827–835. doi:10.1016/j.devcel.2007.02.018.
- Martin, A.C., M. Kaschube, and E.F. Wieschaus. 2009. Pulsed contractions of an actin-myosin network drive apical constriction. *Nature.* 457:495–499. doi:10.1038/nature07522.
- Mason, F.M., S. Xie, C.G. Vasquez, M. Tworoger, and A.C. Martin. 2016. RhoA GTPase inhibition organizes contraction during epithelial morphogenesis. *J. Cell Biol.* 214:603–617. doi:10.1083/jcb.201603077.
- Motegi, F., and A. Sugimoto. 2006. Sequential functioning of the ECT-2 RhoGEF, RHO-1 and CDC-42 establishes cell polarity in *Caenorhabditis elegans* embryos. *Nat. Cell Biol.* 8:978–985. doi:10.1038/ncb1459.

- Munjal, A., J.-M. Philippe, E. Munro, and T. Lecuit. 2015. A self-organized biomechanical network drives shape changes during tissue morphogenesis. *Nature*. 524:351–355. doi:10.1038/nature14603.
- Munro, E., J. Nance, and J.R. Priess. 2004. Cortical flows powered by asymmetrical contraction transport PAR proteins to establish and maintain anterior-posterior polarity in the early *C. elegans* embryo. *Dev. Cell*. 7:413–424. doi:10.1016/j.devcel.2004.08.001.
- Olson, S.K., G. Greenan, A. Desai, T. Müller-Reichert, and K. Oegema. 2012. Hierarchical assembly of the eggshell and permeability barrier in *C. elegans*. *J. Cell Biol.* 198:731–748. doi:10.1083/jcb.201206008.
- Paluch, E., M. Piel, J. Prost, M. Bornens, and C. Sykes. 2005. Cortical actomyosin breakage triggers shape oscillations in cells and cell fragments. *Biophys. J.* 89:724–733. doi:10.1529/biophysj.105.060590.
- Pelletier, V., N. Gal, P. Fournier, and M.L. Kilfoil. 2009. Microrheology of Microtubule Solutions and Actin-Microtubule Composite Networks. 102:188303 EP–.
- Piekny, A.J., and M. Glotzer. 2008. Anillin is a scaffold protein that links RhoA, actin, and myosin during cytokinesis. *Curr. Biol.* 18:30–36. doi:10.1016/j.cub.2007.11.068.
- Piekny, A.J., and P.E. Mains. 2002. Rho-binding kinase (LET-502) and myosin phosphatase (MEL-11) regulate cytokinesis in the early *Caenorhabditis elegans* embryo. *J. Cell. Sci.* 115:2271–2282.



- Piekny, A.J., J.-L.F. Johnson, G.D. Cham, and P.E. Mains. 2003. The *Caenorhabditis elegans* nonmuscle myosin genes *nmy-1* and *nmy-2* function as redundant components of the *let-502*/Rho-binding kinase and *mel-11*/myosin phosphatase pathway during embryonic morphogenesis. 130:5695–5704. doi:10.1242/dev.00807.
- Pohl, C., M. Tionson, J.L. Moore, A. Santella, and Z. Bao. 2012. Actomyosin-based self-organization of cell internalization during *C. elegans* gastrulation. *BMC Biol.* 10:94. doi:10.1186/1741-7007-10-94.
- Rankin, K.E., and L. Wordeman. 2010. Long astral microtubules uncouple mitotic spindles from the cytokinetic furrow. *J. Cell Biol.* 190:35–43. doi:10.1083/jcb.201004017.
- Rauzi, M., P.-F. Lenne, and T. Lecuit. 2010. Planar polarized actomyosin contractile flows control epithelial junction remodelling. *Nature.* 468:1110–1114. doi:10.1038/nature09566.
- Razzell, W., W. Wood, and P. Martin. 2014. Recapitulation of morphogenetic cell shape changes enables wound re-epithelialisation. *Development.* 141:1814–1820. doi:10.1242/dev.107045.
- Ren, Y., J.C. Effler, M. Norstrom, T. Luo, R.A. Firtel, P.A. Iglesias, R.S. Rock, and D.N. Robinson. 2009. Mechanosensing through cooperative interactions between myosin II and the actin crosslinker cortexillin I. *Curr. Biol.* 19:1421–1428. doi:10.1016/j.cub.2009.07.018.

- Robin, F.B., W.M. McFadden, B. Yao, and E.M. Munro. 2014. Single-molecule analysis of cell surface dynamics in *Caenorhabditis elegans* embryos. 11:677–682. doi:10.1038/nmeth.2928.
- Salbreux, G., J.F. Joanny, J. Prost, and P. Pullarkat. 2007. Shape oscillations of non-adhering fibroblast cells. *Phys Biol.* 4:268–284. doi:10.1088/1478-3975/4/4/004.
- Schiffhauer, E.S., T. Luo, K. Mohan, V. Srivastava, X. Qian, E.R. Griffis, P.A. Iglesias, and D.N. Robinson. 2016. Mechanoaccumulative Elements of the Mammalian Actin Cytoskeleton. *Curr. Biol.* 26:1473–1479. doi:10.1016/j.cub.2016.04.007.
- Schmutz, C., J. Stevens, and A. Spang. 2007. Functions of the novel RhoGAP proteins RGA-3 and RGA-4 in the germ line and in the early embryo of *C. elegans*. *Development.* 134:3495–3505. doi:10.1242/dev.000802.
- Schonegg, S., A.T. Constantinescu, C. Hoege, and A.A. Hyman. 2007. The Rho GTPase-activating proteins RGA-3 and RGA-4 are required to set the initial size of PAR domains in *Caenorhabditis elegans* one-cell embryos. *Proc. Natl. Acad. Sci. U.S.A.* 104:14976–14981. doi:10.1073/pnas.0706941104.
- Schonegg, S., and A.A. Hyman. 2006. CDC-42 and RHO-1 coordinate acto-myosin contractility and PAR protein localization during polarity establishment in *C. elegans* embryos. *Development.* 133:3507–3516. doi:10.1242/dev.02527.

- Sedzinski, J., M. Biro, A. Oswald, J.-Y. Tinevez, G. Salbreux, and E. Paluch. 2011. Polar actomyosin contractility destabilizes the position of the cytokinetic furrow. *Nature*. 476:462–466. doi:10.1038/nature10286.
- Severson, A.F., D.L. Baillie, and B. Bowerman. 2002. A Formin Homology protein and a profilin are required for cytokinesis and Arp2/3-independent assembly of cortical microfilaments in *C. elegans*. *Curr. Biol.* 12:2066–2075.
- Solon, J., A. Kaya-Copur, J. Colombelli, and D. Brunner. 2009. Pulsed forces timed by a ratchet-like mechanism drive directed tissue movement during dorsal closure. *Cell*. 137:1331–1342. doi:10.1016/j.cell.2009.03.050.
- Strogatz, S. 1994. Nonlinear dynamics and chaos with applications to physics, biology, chemistry, and engineering. *amazon.ca*.
- Timmons, L., D.L. Court, and A. Fire. 2001. Ingestion of bacterially expressed dsRNAs can produce specific and potent genetic interference in *Caenorhabditis elegans*. *Gene*. 263:103–112. doi:10.1016/S0378-1119(00)00579-5.
- Tokunaga, M., N. Imamoto, and K. Sakata-Sogawa. 2008. Highly inclined thin illumination enables clear single-molecule imaging in cells. 5:159–161. doi:10.1038/nmeth1171.
- Tse, Y.C., A. Piekny, and M. Glotzer. 2011. Anillin promotes astral microtubule-directed cortical myosin polarization. *Mol. Biol. Cell*. 22:3165–3175. doi:10.1091/mbc.E11-05-0399.

- Tse, Y.C., M. Werner, K.M. Longhini, J.-C. Labbe, B. Goldstein, and M. Glotzer. 2012. RhoA activation during polarization and cytokinesis of the early *Caenorhabditis elegans* embryo is differentially dependent on NOP-1 and CYK-4. *Mol. Biol. Cell.* 23:4020–4031. doi:10.1091/mbc.E12-04-0268.
- Vallotton, P., S.L. Gupton, C.M. Waterman-Storer, and G. Danuser. 2004. Simultaneous mapping of filamentous actin flow and turnover in migrating cells by quantitative fluorescent speckle microscopy. *Proc. Natl. Acad. Sci. U.S.A.* 101:9660–9665. doi:10.1073/pnas.0300552101.
- Vasquez, C.G., M. Tworoger, and A.C. Martin. 2014. Dynamic myosin phosphorylation regulates contractile pulses and tissue integrity during epithelial morphogenesis. *J. Cell Biol.* 206:435–450. doi:10.1083/jcb.201402004.
- Watanabe, N., and T.J. Mitchison. 2002. Single-molecule speckle analysis of actin filament turnover in lamellipodia. *Science.* 295:1083–1086. doi:10.1126/science.1067470.
- Weiner, O.D., W.A. Marganski, L.F. Wu, S.J. Altschuler, and M.W. Kirschner. 2007. An actin-based wave generator organizes cell motility. *PLoS Biol.* 5:e221. doi:10.1371/journal.pbio.0050221.
- Werner, M., E. Munro, and M. Glotzer. 2007. Astral signals spatially bias cortical myosin recruitment to break symmetry and promote cytokinesis. *Curr. Biol.* 17:1286–1297. doi:10.1016/j.cub.2007.06.070.

- Zanin, E., A. Desai, I. Poser, Y. Toyoda, C. Andree, C. Moebius, M. Bickle, B. Conradt, A. Piekny, and K. Oegema. 2013. A conserved RhoGAP limits M phase contractility and coordinates with microtubule asters to confine RhoA during cytokinesis. *Dev. Cell.* 26:496–510. doi:10.1016/j.devcel.2013.08.005.
- Zhang, D., and M. Glotzer. 2015. The RhoGAP activity of CYK-4/MgcRacGAP functions non-canonically by promoting RhoA activation during cytokinesis. *Elife.* 4:204. doi:10.7554/eLife.08898.

## Figure Legends

**Figure 1. Actomyosin pulses in 1 and 2-cell stage embryos.** (A) Schematic view of the zygote P0 during early interphase. Open circles represent the two pronuclei. (B) Micrograph of P0 in early interphase expressing GFP::UTR and NMY-2::RFP. In (A) and (B), white arrowheads indicate individual pulses and magenta arrows indicate membrane invaginations (ruffles). (C) Time evolution of a single pulse in P0. The square region measures  $\sim 6.4\mu\text{m}$  by  $6.4\mu\text{m}$ . The time delay between frames is 6s for the first 6 frames, and 8s thereafter. (D) Schematic of an embryo at the early 2-cell stage, showing the anterior blastomere AB and the posterior blastomere P1. Open circles represent the interphase nuclei. (E) Micrograph of an early two-cell stage embryo expressing GFP::UTR and NMY-2::RFP. White arrowheads indicate individual pulses (F) Time evolution of a single pulse. The square region measures  $\sim 6.4\mu\text{m}$  by  $6.4\mu\text{m}$ . The time delay between frames is 2s for the first 5 frames, and 4s thereafter.

**Figure 2. Single-molecule analysis of actin network assembly, disassembly and deformation during individual pulsed contractions.** (A) One frame of a time lapse sequence taken from an embryo expressing low levels of Actin::GFP. A patch of cortex undergoing a pulse is identified from the time lapse sequence, and outlined in cyan. (B) Automatic particle detection of single-molecules from the image in (A). (C) Trajectories of the molecules displayed in (B) that were tracked for longer than 2s. (D) A polygonal region of interest identified at time  $t = t_{\text{ref}}$ , in (A) (dashed cyan polygon) is propagated forward and backward in time using the trajectories of tracked particles (see Materials and Methods and Movies S2, S3). (E-H) Simultaneous measurements of single molecule dynamics and patch deformation over time. (E) Strain rate, measured using the particle-based method (see Materials and methods). (F) Number of actin

molecules in the patch. (G-H) Appearance rates (G) and disappearance rates (H) of actin molecules. Red shading in (F-H) indicates the time period in which the cortex is contracting locally (strain rate  $< 0$ ).

**Figure 3. Spatiotemporal modulation of assembly and disassembly drives transient accumulation of F-actin and Myosin II during pulsed contractions.** (A-D) Data from individual pulses, aligned with respect to the onset of contraction and then averaged to display particle-based strain rate (A), numbers of actin molecules (scaled by the average number for each pulse) (B) appearance rate (C), and disappearance rate (D) versus time. (E) Total rate of change in actin density (green) and the individual contributions to rate of change from turnover and surface contraction. (F) Distribution of time delays between the initiation of contraction and actin accumulation. Data in (A-F) were averaged over 42 pulses, collected in 8 embryos. (G-J) Average myosin dynamics synchronized with respect to time at which myosin density reached peak levels during a pulse, displaying particle-based strain rate (G), number of molecules (scaled to the average number for each pulse) (H), appearance rate (I) and disappearance rate (J) versus time. Data were averaged over 30 pulses, collected in 5 embryos. Error bars: 95% confidence interval.

**Figure 4. Local pulses of RhoA activation underlie pulsed accumulation and disappearance of F-actin and Myosin II.** (A) Micrograph of a 2-cell stage embryo expressing GFP::AHPH as a reporter for RhoA activity, and NMY-2::RFP. (B) Temporal dynamics of GFP::AHPH and NMY-2::RFP accumulation during a single pulse. The square region measures  $\sim 5.3\mu\text{m}$  by  $5.3\mu\text{m}$ . The time between frames is 2s for the first five frames, and 4s thereafter. (C) Above: Normalized fluorescence intensities of GFP::AHPH, and NMY-2::RFP. Below: A kymograph showing that

local contraction (concerted movements of myosin puncta) begins after the accumulation of GFP::AHPH. The yellow box below left indicates the region used to generate the kymograph. (D) Comparison of averaged normalized fluorescence intensities vs time for active RhoA (GFP::AHPH), Myosin (NMY-2::GFP) and F-actin (GFP::UTR) from two-color data, co-aligned with respect to a common reference signal (NMY-2::RFP). Data were co-aligned with respect to the time at which NMY-2::RFP reaches 25% threshold. Hued regions report 95% confidence intervals. (E) Distribution of the delays between the onset of accumulation of NMY-2::RFP, and the onset of accumulation of GFP::AHPH, NMY-2::GFP and GFP::UTR. Onset of accumulation was measured as the time at which normalized probe intensity rose above 25% of its maximal level. (F) Distribution of the delays between the onset of disappearance of NMY-2::RFP, and the onset of disappearance of GFP::AHPH, NMY-2::GFP and GFP::UTR. Onset of disappearance was measured as the time at which normalized probe intensity fell below 75% of its maximal level. In box plots, the central mark represents the median, the box indicates the 25th and 75th percentile, the whiskers mark the minimum and maximum values and the “+” symbol represents outliers.

**Figure 5. Myosin II is not required for the pulsed activation of RhoA.** (A) Comparison of pulse dynamics in zygotes expressing GFP::AHPH and NMY-2::mKATE and treated with either *spd-5(RNAi)* or *nmy-2(RNAi)*. Top panels show myosin localization (NMY-2::mKATE), middle panels show RhoA activity (GFP::AHPH). Bottom panels are kymographs showing GFP::AHPH dynamics over time. Dashed yellow rectangles in middle panel indicate the regions from which the kymographs were made. Vertical yellow arrows indicate a region undergoing repeated pulses.



Intensities were scaled identically for *spd-5(RNAi)* and *nmy-2(RNAi)* zygotes. (B) Top: Mean intensities of NMY-2::mKATE (red) and GFP::AHPH (green) vs time for a single pulse in an *nmy-2(RNAi)* zygote. Bottom: sequential snapshots of the region undergoing the pulse showing NMY-2::mKATE (red) and GFP::AHPH (green) distributions. Yellow arrowheads indicate the 1-2 particles that can be detected in the region undergoing a pulse. (C) Mean intensity of GFP::AHPH over time in *nmy-2(RNAi)* and *spd-5(RNAi)* zygotes, aligned with respect to the time at which the normalized signal reaches 25% of its maximum value. For *spd-5(RNAi)* zygotes, the signal was measured either within the entire boxed region in which each pulse occurred or at its periphery (see Figure S3 for details). Hued regions report 95% confidence intervals.

**Figure 6. RhoA activation is autocatalytic.** (A) The time derivative of normalized RhoA activity (GFP::AHPH) plotted vs normalized activity during the early phase of pulse initiation in P0 (top panel, n = 40 pulses) and AB (bottom panel, n = 41 pulses). Error bars: 95% confidence interval. (B-C) Analysis of pulse dynamics in embryos progressively depleted of RHO-1 by RNAi. (B) Top panels show GFP::AHPH distributions in interphase embryos from mothers subjected to no (wild type), 10 hours and 13 hours of *rho-1(RNAi)*. Middle panels show kymographs from the same embryos illustrating spatiotemporal dynamics of GFP::AHPH from interphase through cytokinesis. Dashed yellow lines indicate approximate pattern of cortical flow. Cyan arrowheads indicate accumulation of GFP::AHPH just prior to cytokinesis. (C) Timeline indicating the presence (magenta circles) or absence (cyan circles) of pulsing in

embryos treated with *rho-1(RNAi)* for the indicated times, revealing an abrupt transition from pulsing to no pulsing at ~12 hours post-treatment.

**Figure 7. Delayed accumulation of RGA-3/4 mediates negative feedback required for pulse termination.** (A) Micrograph of a 2-cell stage embryo expressing GFP::RGA-3 (green) and NMY-2::RFP (red). (B) Temporal dynamics of a single pulse. The square region measures 6.4μm by 6.4μm. (C) Top: Averaged normalized fluorescence intensities vs time for NMY-2::RFP and GFP::RGA-3 from two-color data, co-aligned with respect to the time at which NMY-2::RFP reaches 25% threshold. The averaged normalized fluorescence intensity of GFP::AHPH, co-aligned with NMY-2::RFP. Bottom: The averaged time derivative of the normalized GFP::AHPH intensity, again co-aligned using NMY-2::RFP. Hued regions report 95% confidence intervals. (D) (top panels) Distributions of GFP::AHPH during interphase in zygotes with the indicated genotypes. (bottom panels) Kymographs showing patterns of GFP::AHPH distribution and redistribution during interphase for the same genotypes. Micrographs of 1-cell stage embryos expressing GFP::AHPH. RhoA exhibits pulsatile activity in *rga-3/4(+/-)* embryos (control n=4 embryos, *mlc-4* RNAi n=6 embryos) but not *rga-3/4(-/-)* embryos (control n=9 embryos, *mlc-4* RNAi n=8 embryos). (bottom panels) Kymographs of embryos in top panels showing RhoA activity during interphase.

**Figure 8. Cortical RGA-3/4 localization depends on F-actin** (A) Micrographs of P0 (top) and AB (bottom) embryos co-expressing GFP::RGA-3 and mCherry::LifeAct. (B) Zygote co-

expressing GFP::RGA-3 and mCherry::LifeAct before (top) and ~90s after (bottom) treatment with 10 $\mu$ M Latrunculin A.

**Figure 9. Autocatalytic RhoA activation and delayed negative feedback through RGA-3/4**

**is sufficient to produce locally excitable RhoA dynamics.** (A) Schematic representation of the

simple mathematical model used to model RhoA pulse dynamics. (B) Comparison between

measured (dashed lines) and simulated (solid lines) pulse dynamics for the case in which  $n = 1$ ,

$k_r^0 = 0.005$ ,  $k_p^0 = 0.006$ . The remaining model parameters were estimated by fitting data

( $m = 1.5289$ ,  $k_p^{fb} = 0.1698$ ,  $K_{fb} = 0.4581$ ,  $K_{GAP} = 0.001$ ,  $k_r^{ass} = 0.1592$ ,  $k_r^{diss} = 0.1101$ ; see

Materials and Methods for details). (C) Simulation dynamics for the parameter values in (B) are

oscillatory, with pulses occurring at regular intervals. (D) A small change in the basal RhoA

activation rate from  $k_p^0 = 0.006$  to  $k_p^0 = 0.004$  results in excitable dynamics in which a stable

rest state can be destabilized by a transient reduction of RGA-3/4 (vertical black arrow) to trigger

a single pulse of RhoA activity.

**Table 1. List of strains used in this study**

| Strain Name | Genotype                                                                                                                                                                     | Source                         |
|-------------|------------------------------------------------------------------------------------------------------------------------------------------------------------------------------|--------------------------------|
| JJ1473      | <i>unc-119(ed3)III; zuIs45 [nmy-2::NMY-2::GFP; unc-119(+)] V</i>                                                                                                             | Nance et al, 2003              |
| JH1541      | <i>unc-119(ed3)III; pJH7.03 [unc-119(+); pie-1::GFP::ACT-5::pie-1 3' UTR]</i>                                                                                                | Geraldine Seydoux, unpublished |
| EM198       | <i>unc-119(ed3)III; mgSi5[cb-unc-119 (+) pie-1::GFP::ANI-1(AH+PH)]II; unc119(ed3)III; zuIs151 [nmy-2::NMY-2-mRFP; unc-119(+)] LG</i>                                         | This study                     |
| EM45        | <i>unc-119(ed3)III; ltIs28 [pASM14; pie-1::GFP-TEV-STAG::ANI-1::pie-1 3' UTR; unc-119(+)]; zuIs151 [nmy-2::NMY-2::mRFP; unc-119(+)] LG</i>                                   | This study                     |
| EM101       | <i>unc-119(ed3)III; mgSi3[cb-unc-119(+); pie-1::GFP::utrophin::pie-1 3' UTR] II; zuIs151 [nmy-2::NMY-2::mRFP; unc-119(+)] LG</i>                                             | This study                     |
| EM85        | <i>unc-119(ed3)III; zuIs45 [nmy-2::NMY-2::GFP; unc-119(+)]; zuIs151 [nmy-2::NMY-2::mRFP, unc-119(+)] LG</i>                                                                  | This study                     |
| EM264       | <i>unc-119(ed3)III; mgSi5[cb-unc-119 (+); pie-1::GFP::ANI-1(AH+PH)]II; nmy-2(cp52[nmy-2::mkate2 + LoxP unc-119(+)] LoxP) I</i>                                               | This study                     |
| EM302       | <i>mgSi5[cb-unc-119 (+) pie-1::GFP::ANI-1(AH+PH)]II; nmy-2(cp52[nmy-2::mkate2 + LoxP unc-119(+)] LoxP) I; rga-4(ok1935) unc-62(e644) rga-3(ok1988) V / nT1[qIs51] (IV;V)</i> | This study                     |
| EM301       | <i>unc-119(ed3)III; nmy-2(cp52[nmy-2::mkate2 + LoxP unc-119(+)] LoxP) I; tSi25 [pOD928/EZ-36; prga-3::GFP::RGA-3; cb-unc-119(+)] II</i>                                      | This study                     |
| EM291       | <i>[unc-119(+); pie1::mCherry:Lifeact] ; tSi25 [pOD928/EZ-36; prga-3::GFP::RGA-3; cb-unc-119(+)]</i>                                                                         | This study                     |
| EM200       | <i>unc-119(ed3)III; mgSi5[cb-UNC-119 (+) pie-1::GFP::ANI-1(AH+PH)]II; zuIs151 [nmy-2::NMY-2-mRFP, unc-119(+)] LG</i>                                                         | This study                     |

# Robin, Michaux, et al, Figure 1

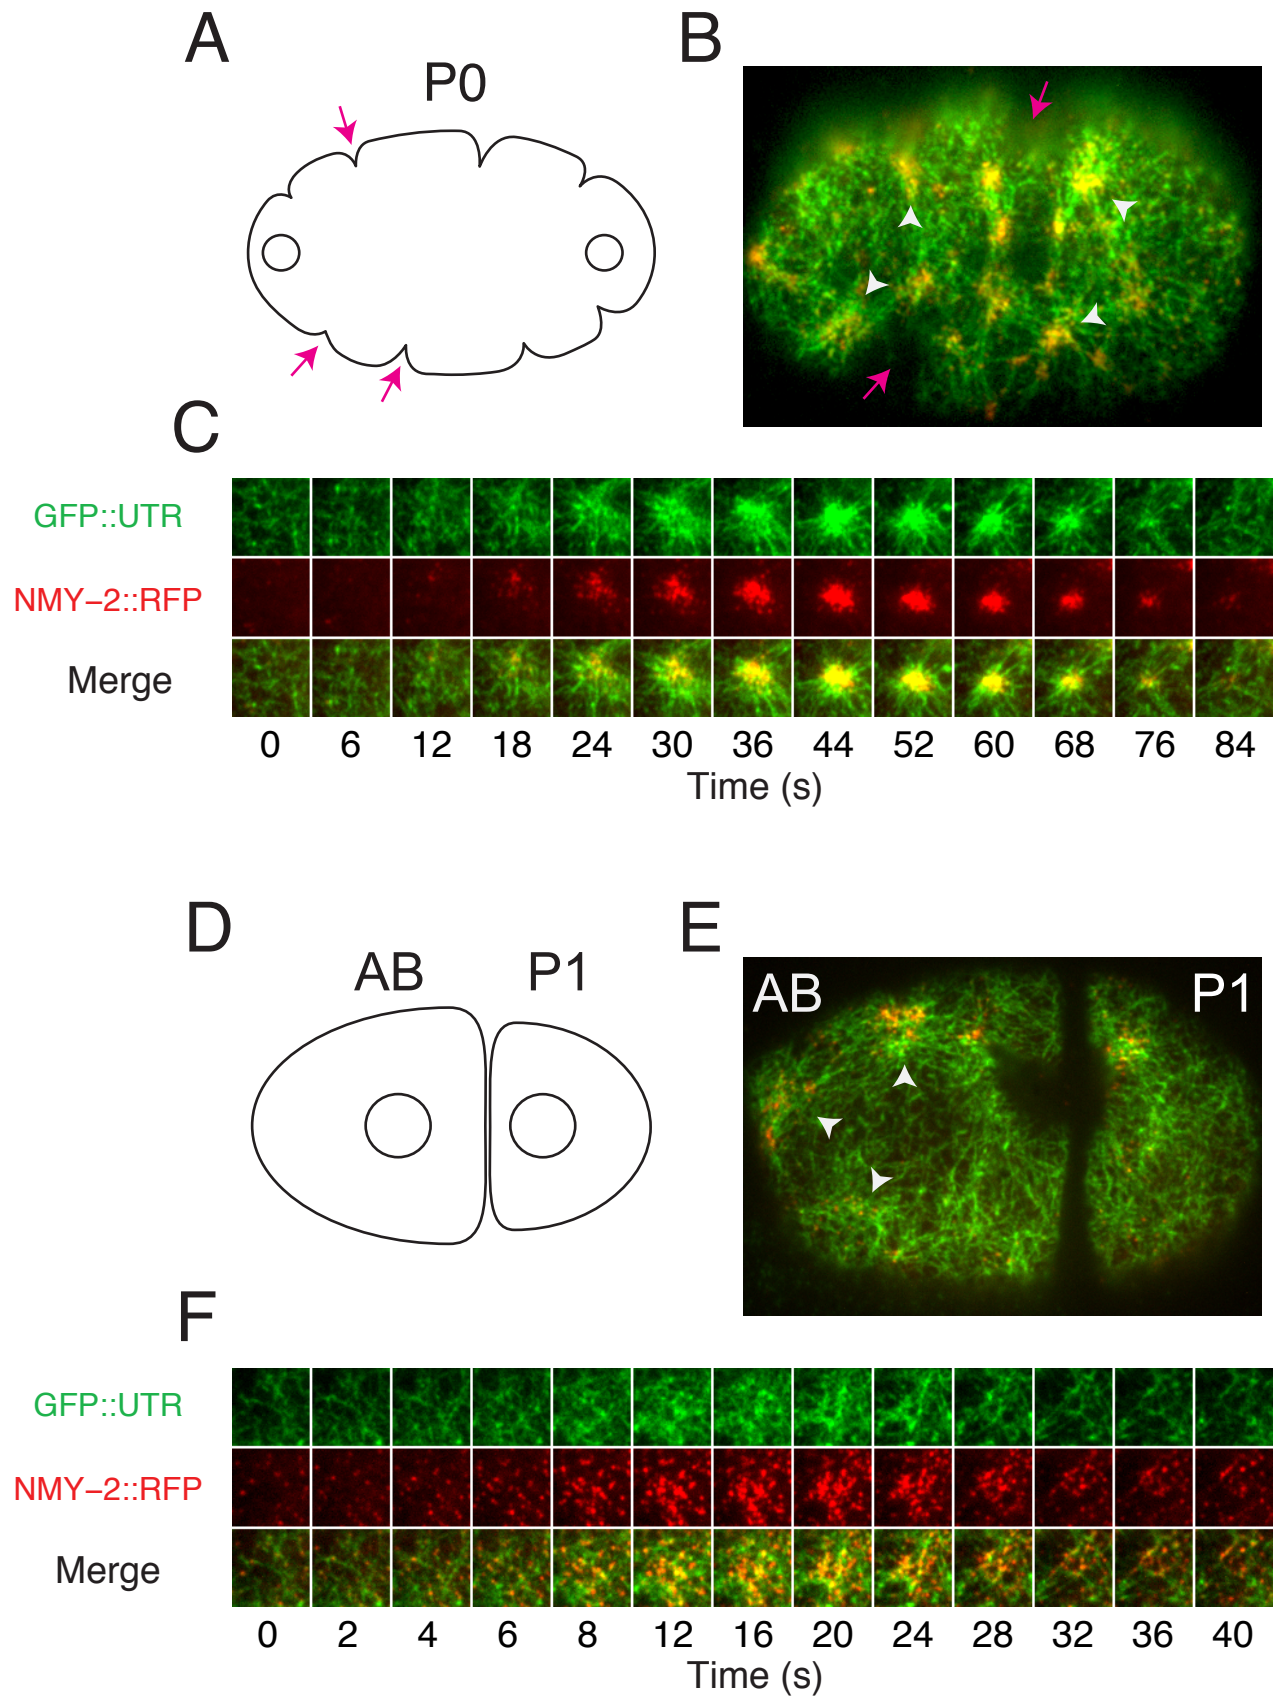

# Robin, Michaux, et al, Figure 2

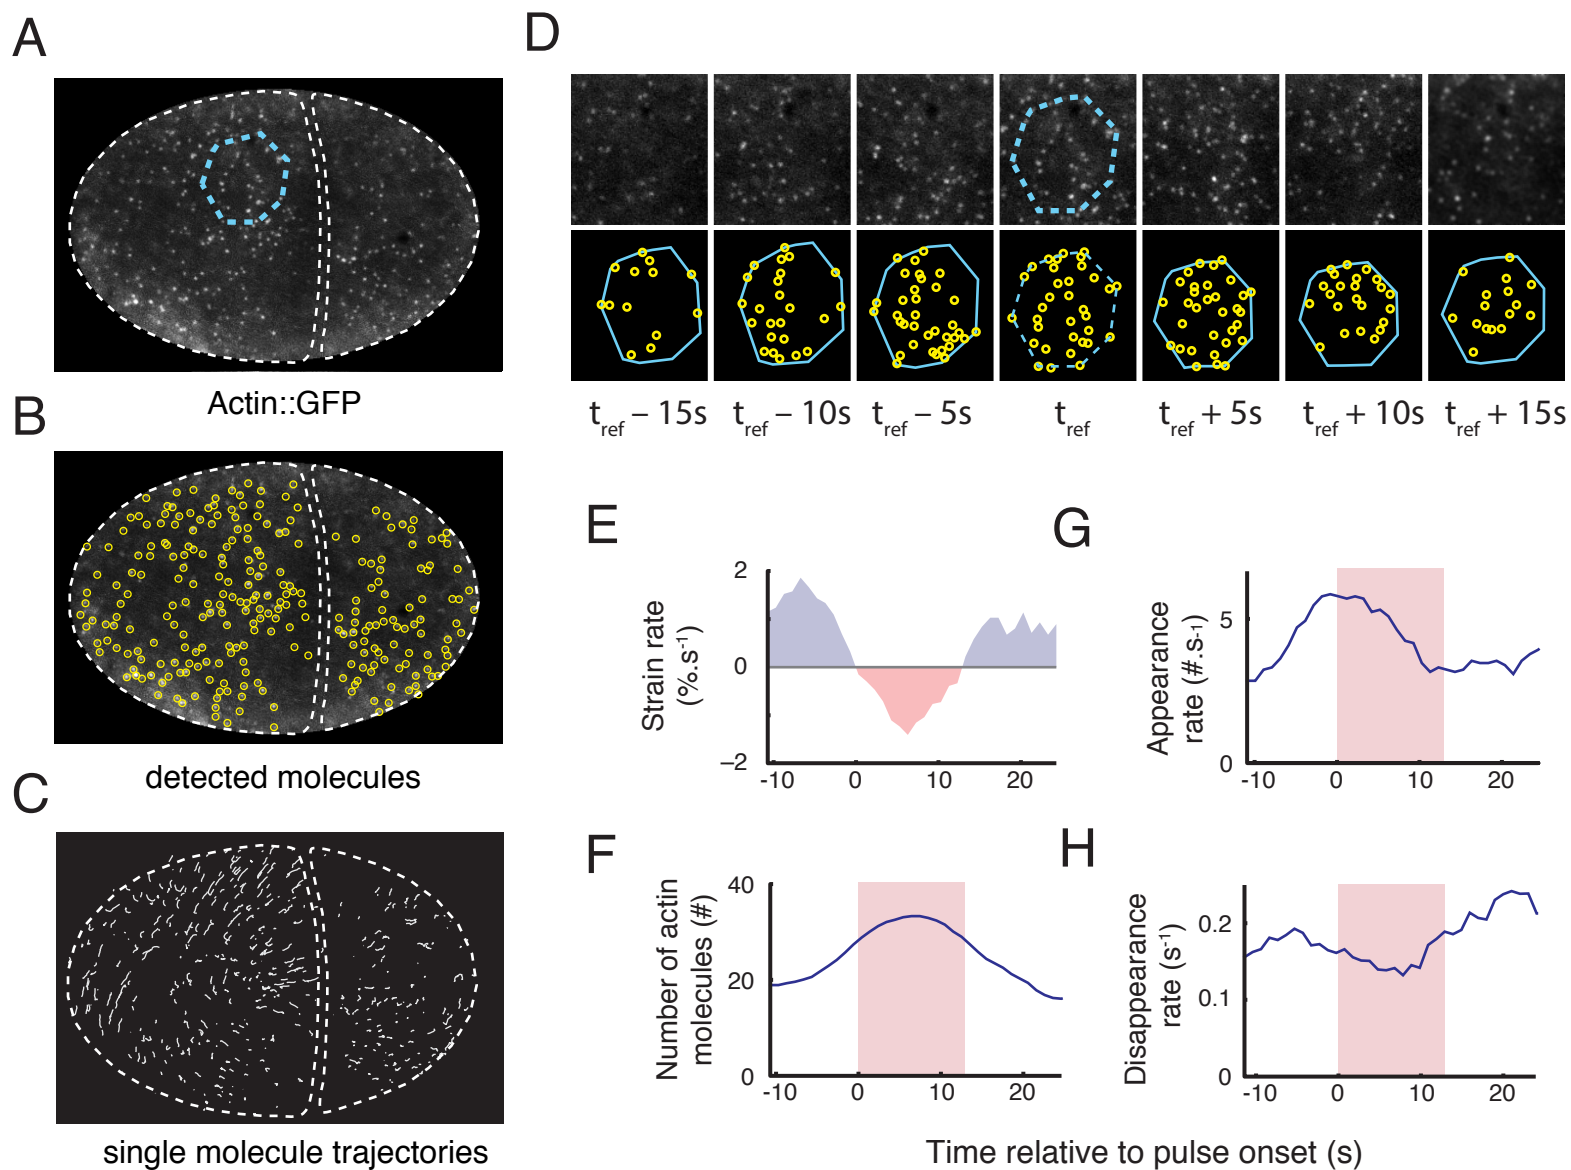

# Robin, Michaux, et al, Figure 3

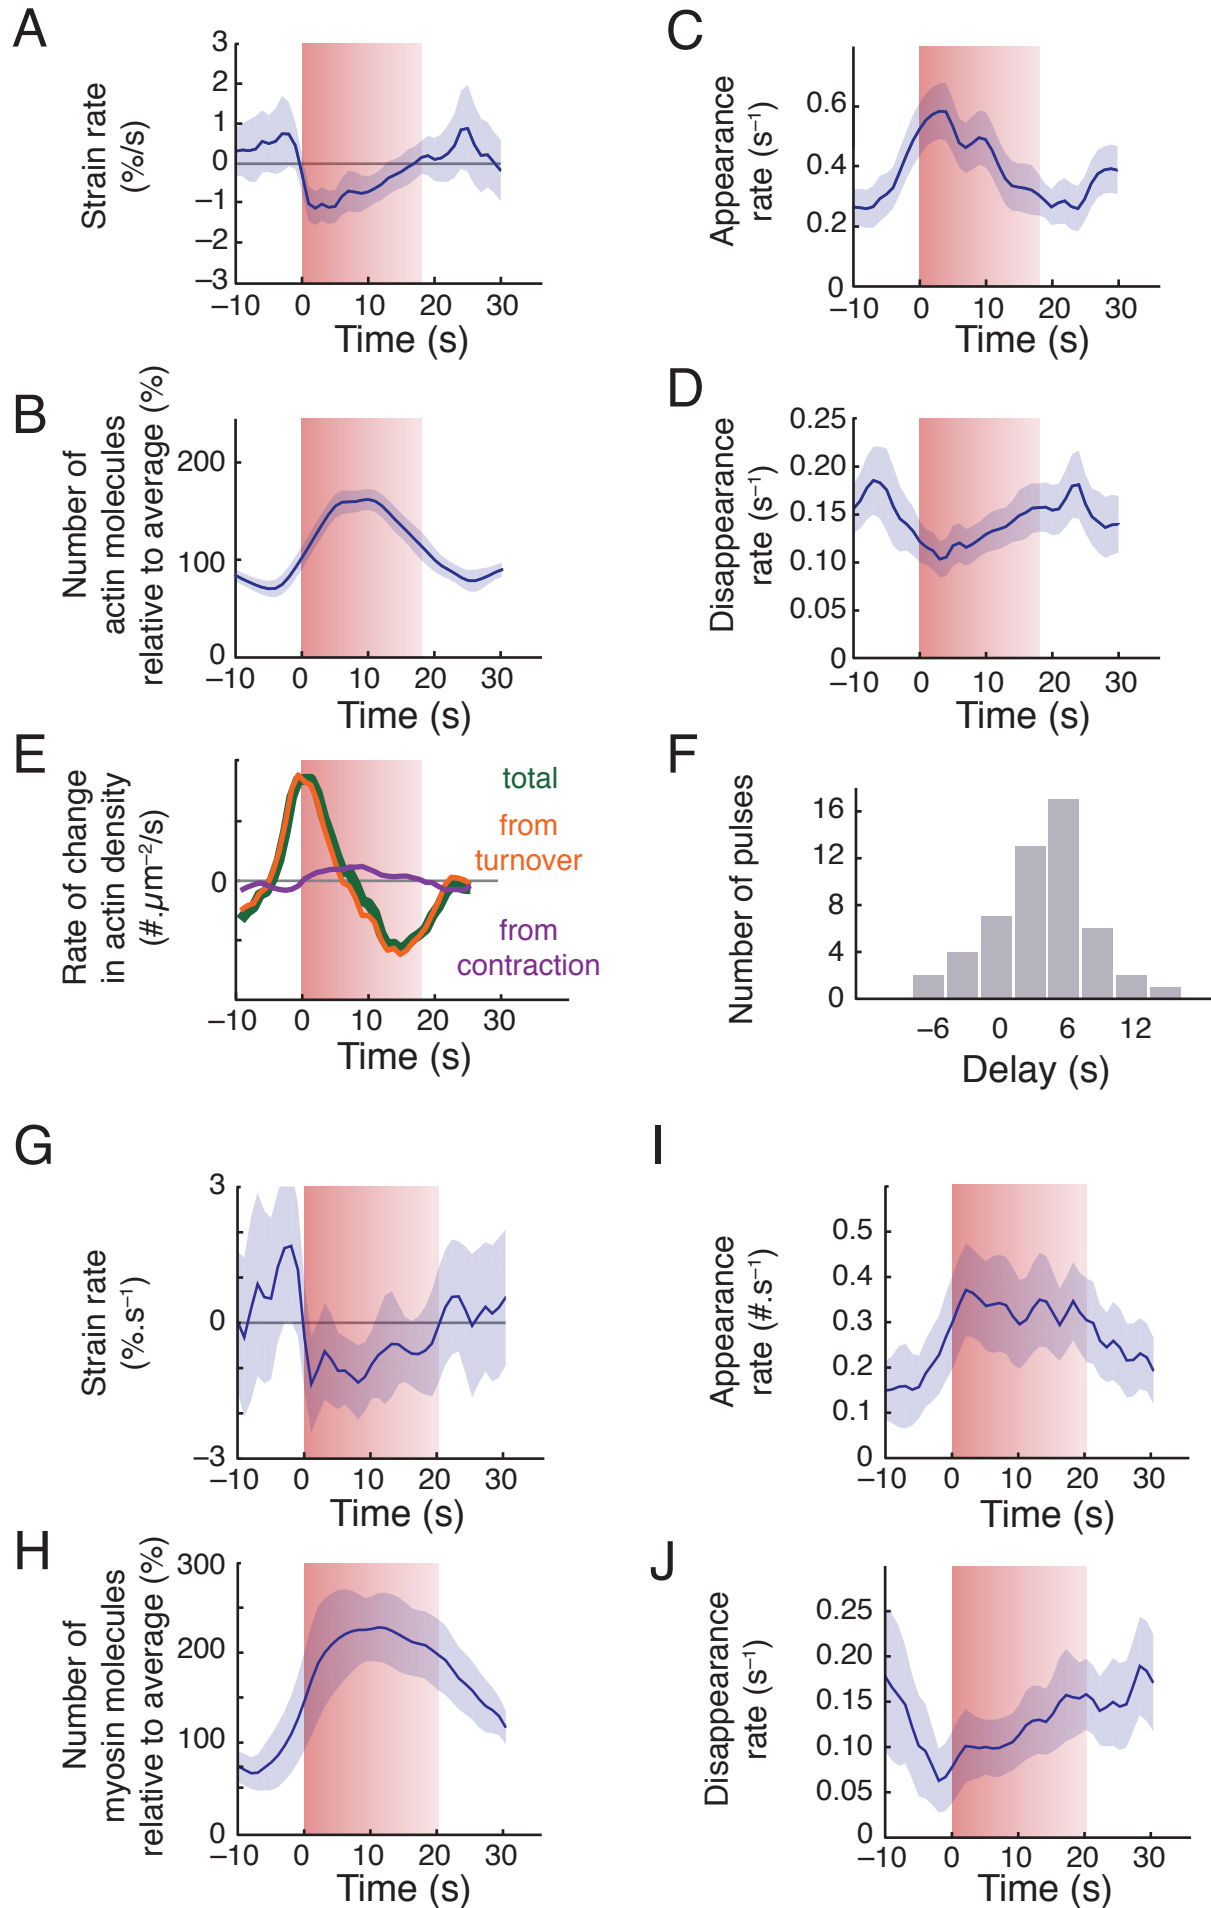



# Robin, Michaux, et al, Figure 4

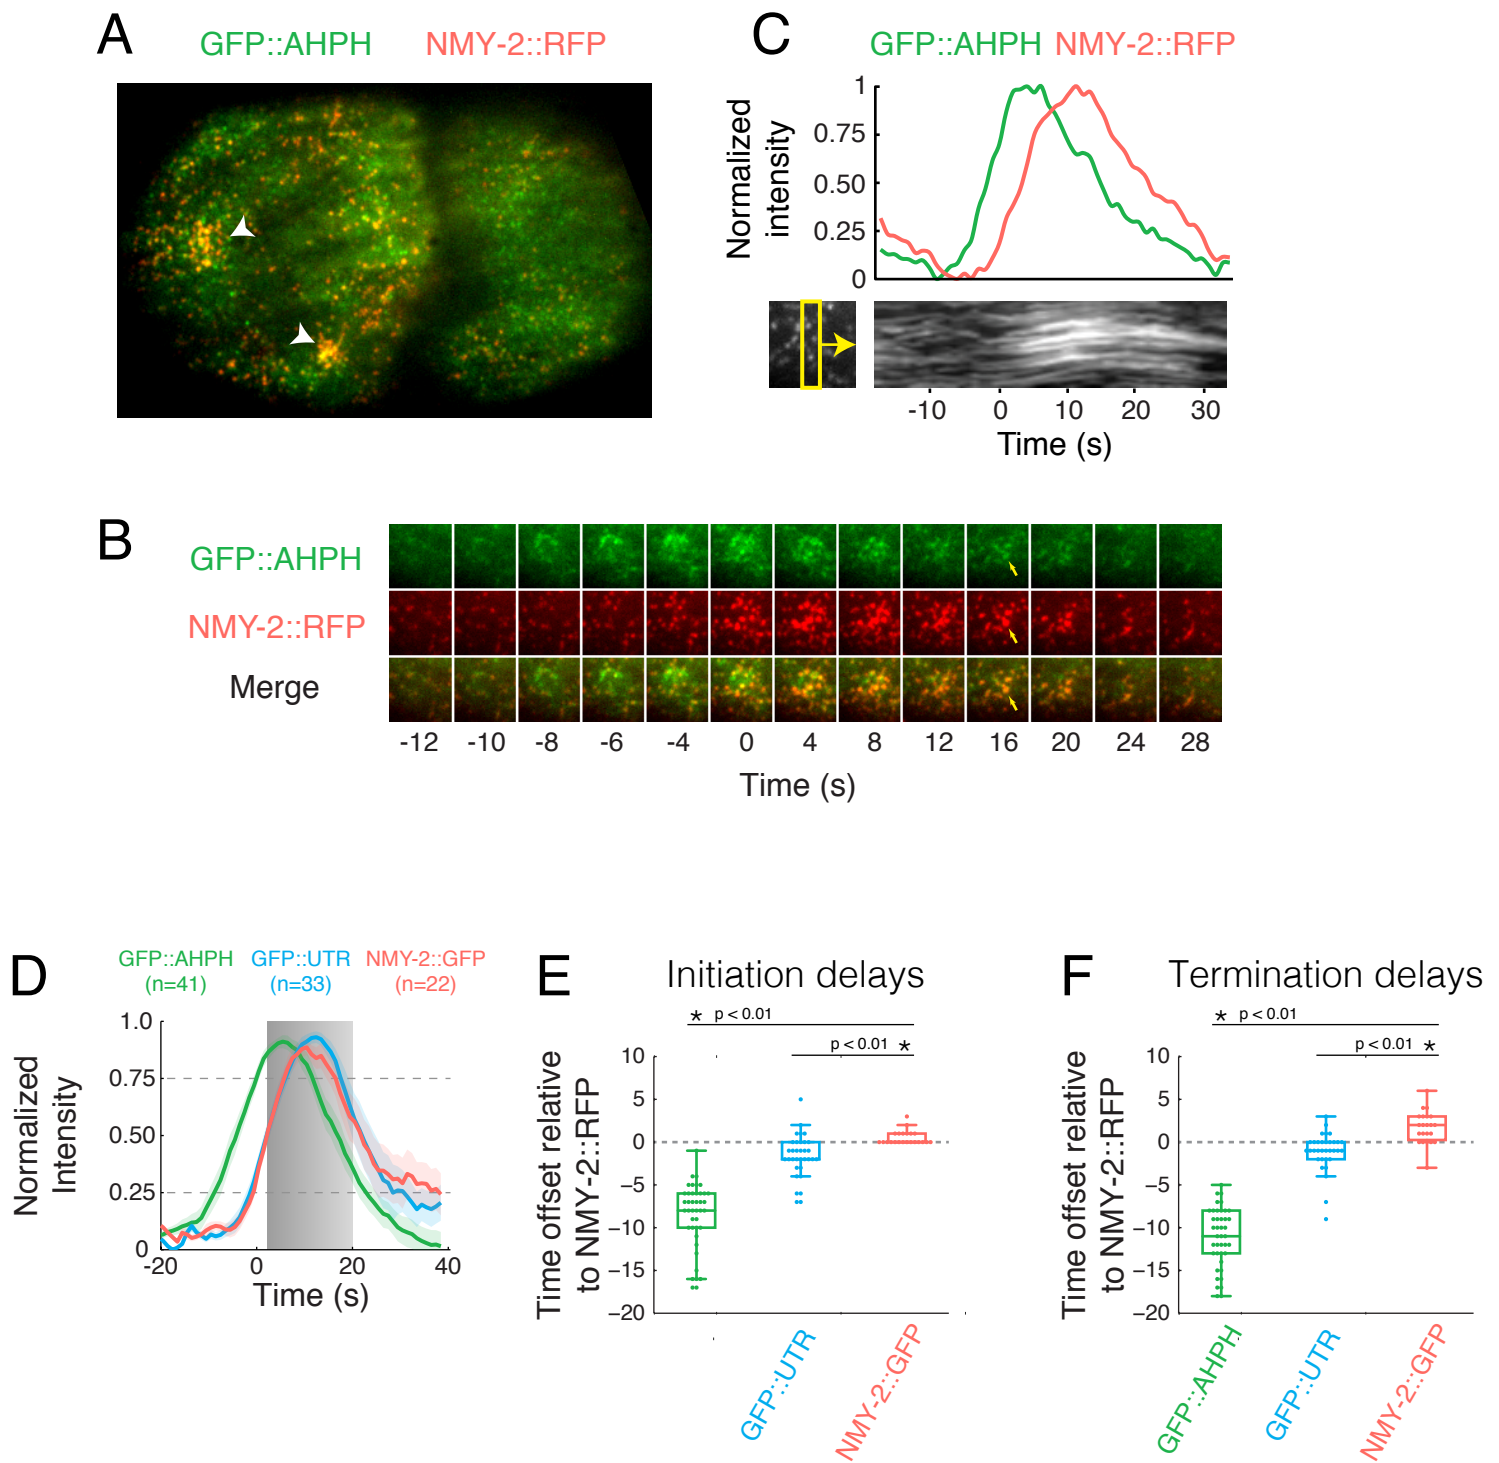



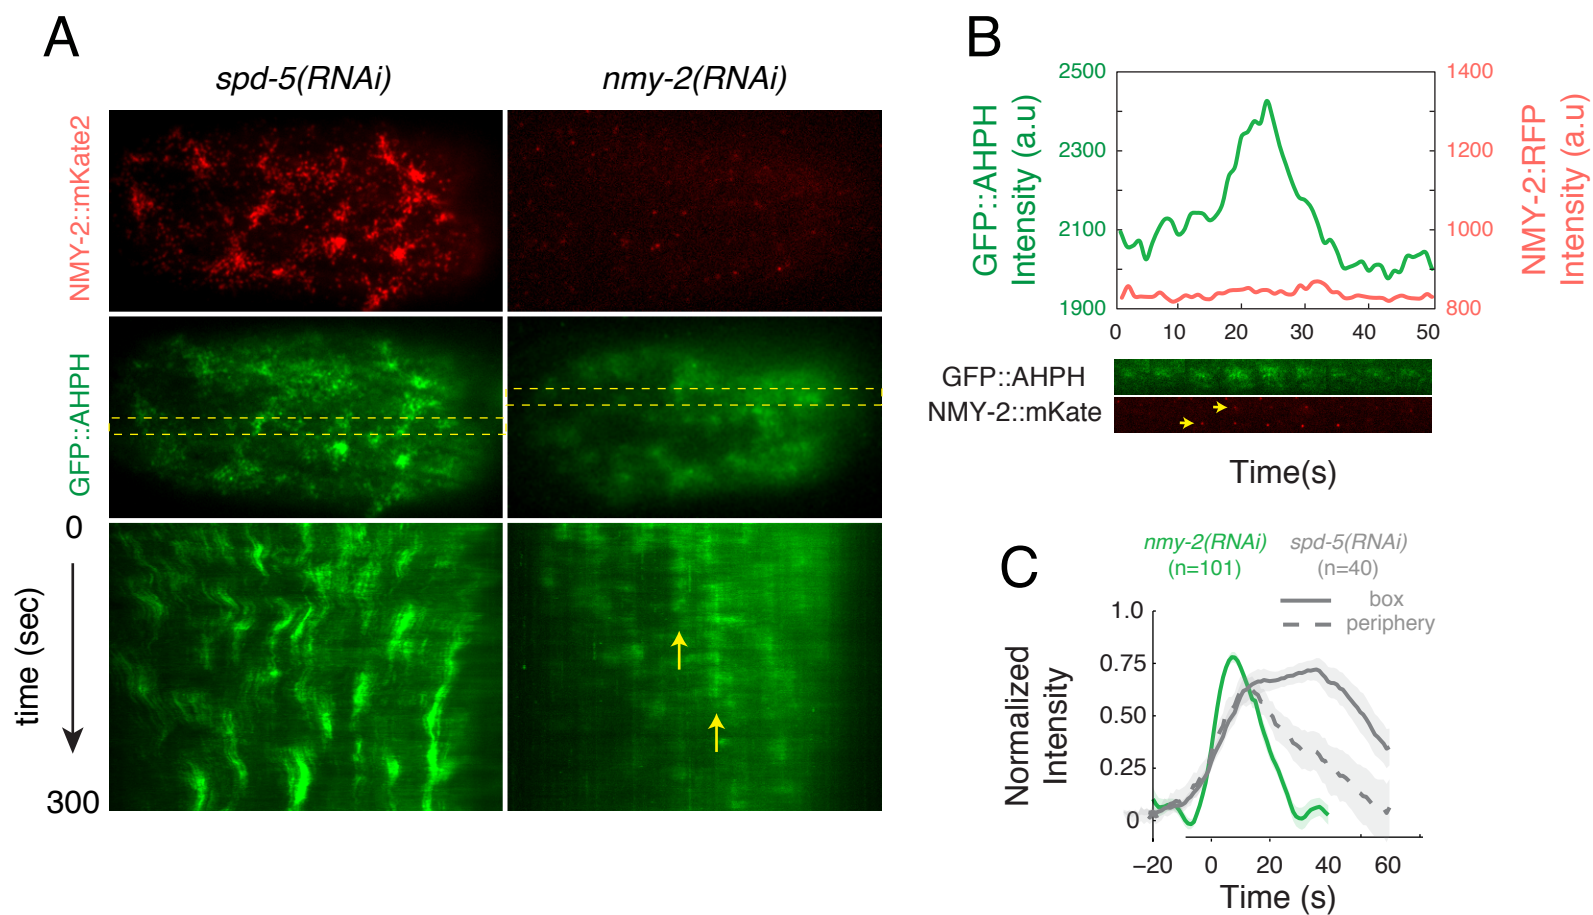

# Robin, Michaux, et al, Figure 6

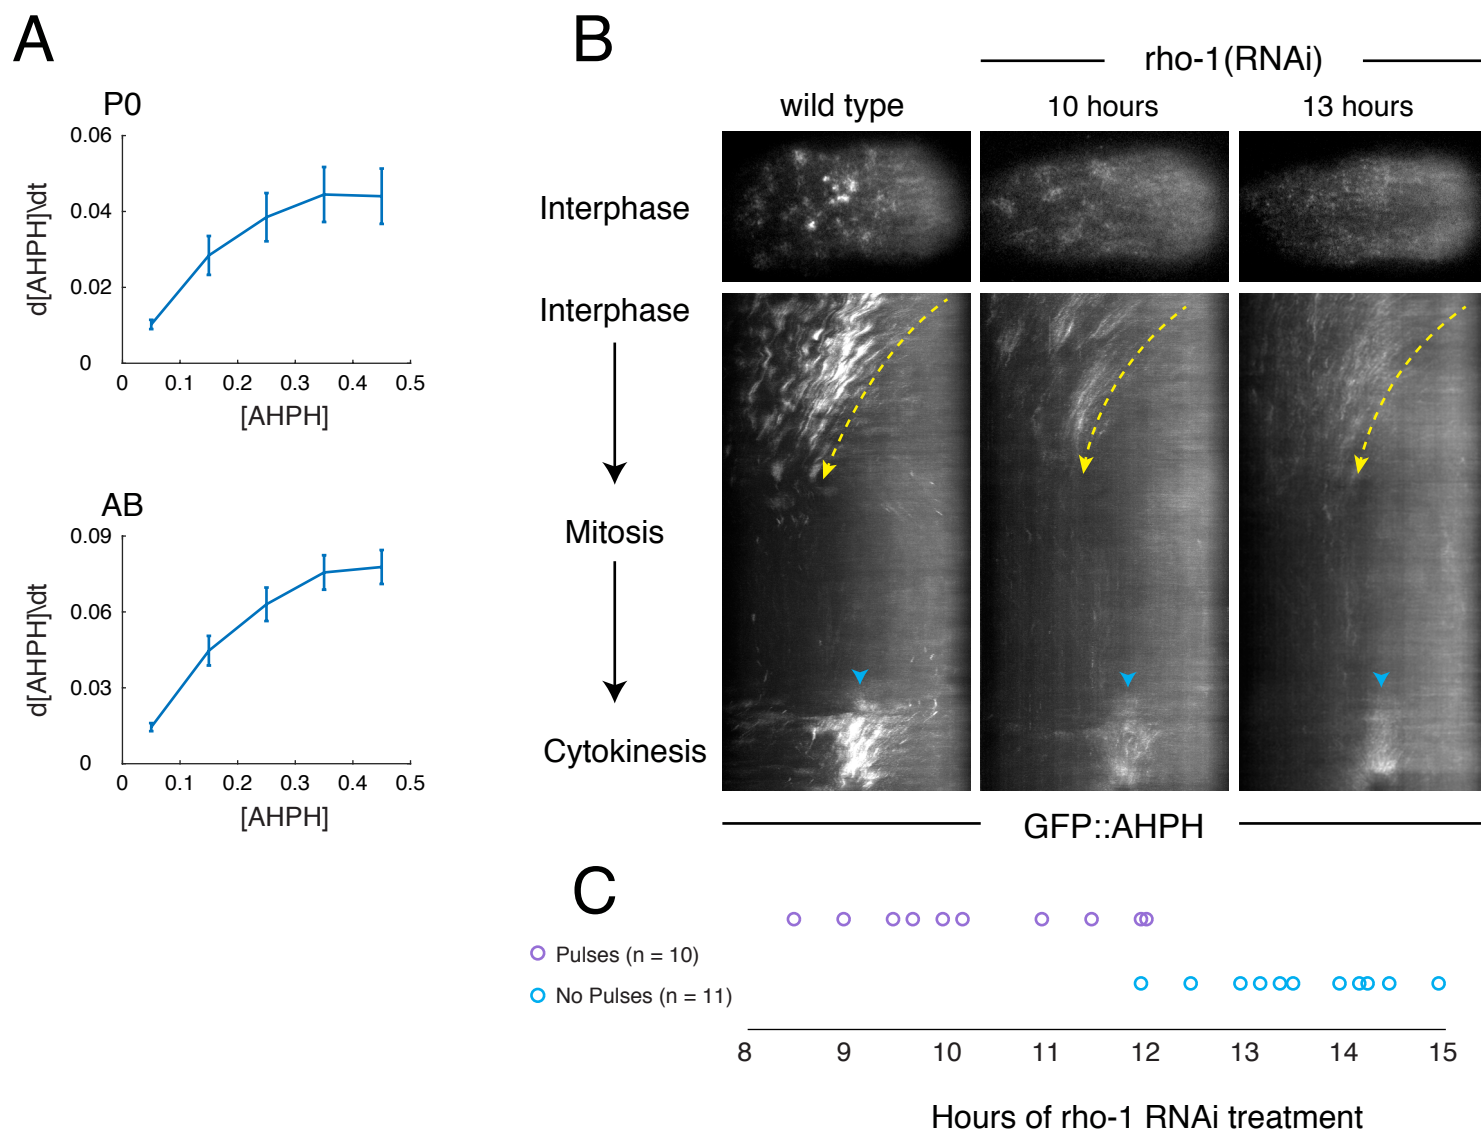

# Robin, Michaux, et al, Figure 7

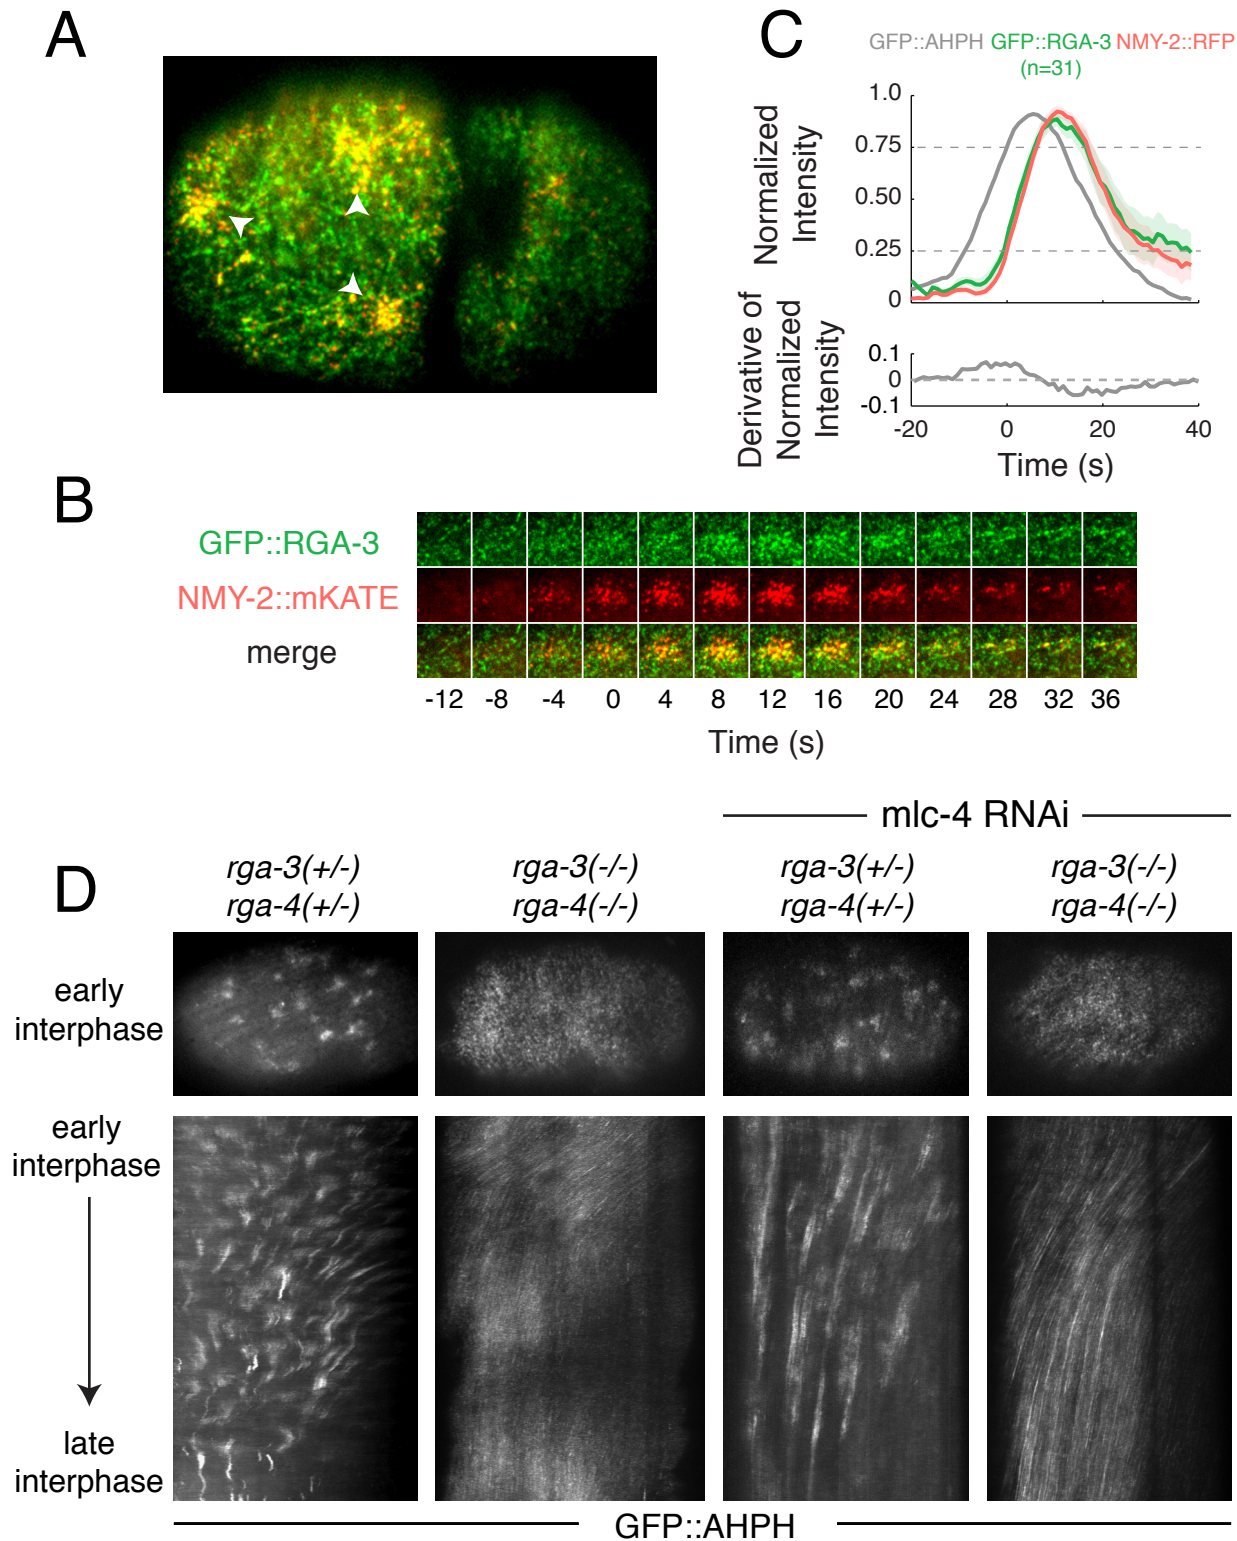

A

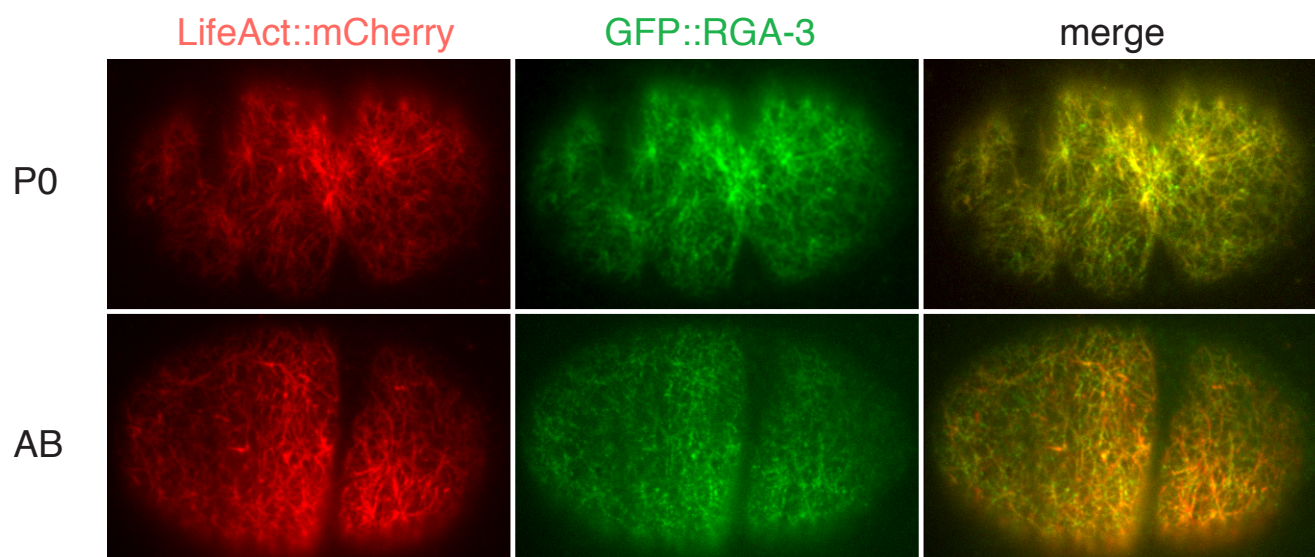

B

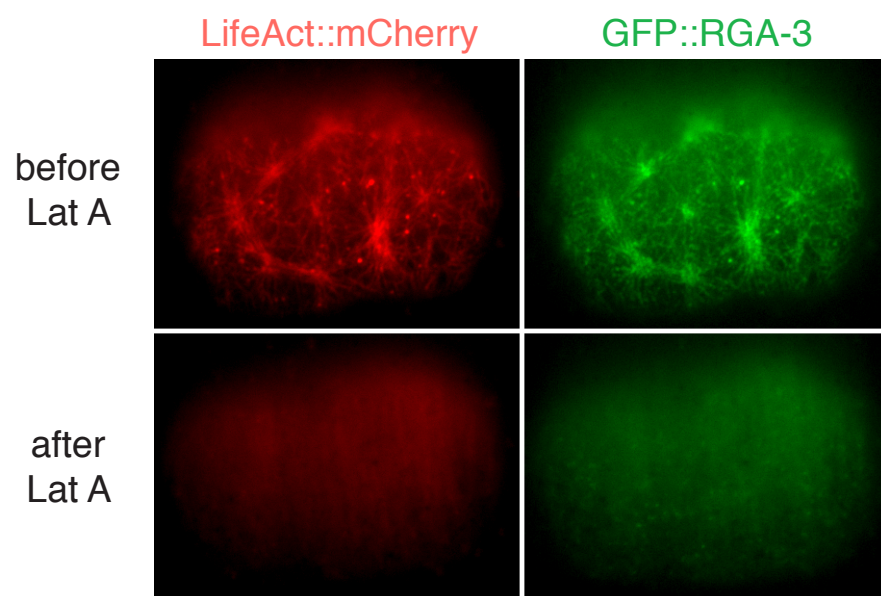

# Robin, Michaux, et al, Figure 9

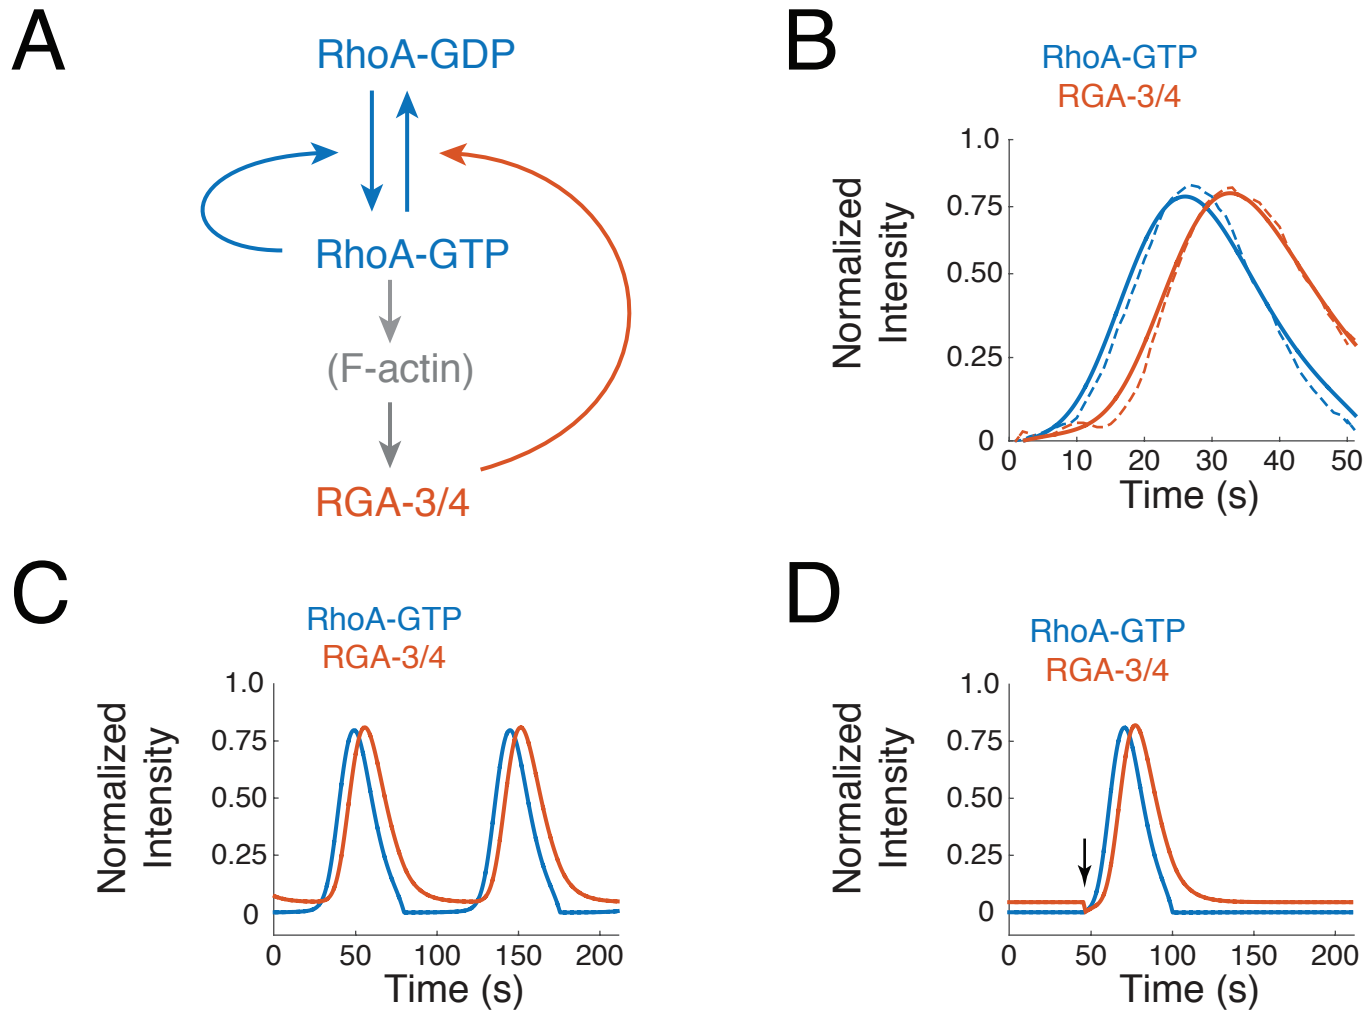

Source: http://www.biorxiv.org/content/10.1101/076356v1.full.pdf
